# Supplementary material
Source: PubMed Central journal article supplement (PMC2771215)

## Supporting Information

# Fluoro-Julia Olefination as a Mild, High-Yielding Route to $\alpha$ -Fluoro Acrylonitriles

Maria del Solar, Arun K. Ghosh and Barbara Zajc\*

Department of Chemistry, The City College and The City University of New York, 160 Convent Avenue, New York, New York 10031

---

### TABLE OF CONTENTS

| Information                                                                                                                 | Page |
|-----------------------------------------------------------------------------------------------------------------------------|------|
| General Experimental Methods                                                                                                | S3   |
| Synthesis of (1,3-Benzothiazol-2-ylsulfanyl)acetonitrile ( <b>2a</b> )                                                      | S3   |
| Synthesis of Ethyl (1,3-Benzothiazol-2-ylsulfanyl)fluoroacetate ( <b>8</b> ) from Commercial Fluorinated Precursor <b>7</b> | S4   |
| Analytical Data of Pure <b>6a</b>                                                                                           | S4   |
| (1-Phenyl-1 <i>H</i> -tetrazol-5-ylsulfanyl)fluoroacetonitrile ( <b>6b</b> )                                                | S4   |
| Table 1                                                                                                                     | S5   |
| TLC Separation of <i>E/Z</i> Mixtures <b>12</b> , <b>14</b> , <b>16</b> , <b>17</b> , <b>21</b> and <b>26</b>               | S7   |
| References                                                                                                                  | S7   |
| <sup>1</sup> H NMR of (1,3-Benzothiazol-2-ylsulfanyl)acetonitrile ( <b>2a</b> )                                             | S8   |
| <sup>1</sup> H NMR of (1,3-Benzothiazol-2-ylsulfonyl)acetonitrile ( <b>3</b> )                                              | S9   |
| <sup>1</sup> H NMR of Ethyl (1,3-Benzothiazol-2-ylsulfanyl)fluoroacetate ( <b>8</b> )                                       | S10  |
| <sup>1</sup> H NMR of (1,3-Benzothiazol-2-ylsulfanyl)fluoroacetamide ( <b>11</b> )                                          | S11  |
| <sup>1</sup> H NMR of (1,3-Benzothiazol-2-ylsulfanyl)fluoroacetonitrile ( <b>6a</b> )                                       | S12  |
| <sup>1</sup> H NMR of (1-Phenyl-1 <i>H</i> -tetrazol-5-ylsulfanyl)fluoroacetonitrile ( <b>6b</b> )                          | S13  |
| <sup>1</sup> H NMR of (1,3-Benzothiazol-2-ylsulfonyl)fluoroacetonitrile ( <b>4</b> )                                        | S14  |
| <sup>13</sup> C NMR of (1,3-Benzothiazol-2-ylsulfonyl)fluoroacetonitrile ( <b>4</b> )                                       | S15  |
| <sup>1</sup> H NMR of <i>E/Z</i> - <b>12</b>                                                                                | S16  |
| <sup>1</sup> H NMR of <i>E/Z</i> - <b>13</b>                                                                                | S17  |
| <sup>1</sup> H NMR of <i>E/Z</i> - <b>14</b>                                                                                | S18  |
| <sup>1</sup> H NMR of <i>E/Z</i> - <b>15</b>                                                                                | S19  |
| <sup>1</sup> H NMR of <i>E/Z</i> - <b>16</b>                                                                                | S20  |
| <sup>1</sup> H NMR of <i>E/Z</i> - <b>17</b>                                                                                | S21  |
| <sup>1</sup> H NMR of <i>E/Z</i> - <b>18</b>                                                                                | S22  |
| <sup>1</sup> H NMR of <i>E/Z</i> - <b>19</b>                                                                                | S23  |
| <sup>1</sup> H NMR of <i>E/Z</i> - <b>20</b>                                                                                | S24  |

|                                      |     |
|--------------------------------------|-----|
| <sup>1</sup> H NMR of <i>E/Z</i> -21 | S25 |
| <sup>1</sup> H NMR of <i>E/Z</i> -22 | S26 |
| <sup>1</sup> H NMR of <i>E/Z</i> -23 | S27 |
| <sup>1</sup> H NMR of <i>E/Z</i> -24 | S28 |
| <sup>1</sup> H NMR of <i>E/Z</i> -25 | S29 |
| <sup>1</sup> H NMR of <i>E/Z</i> -26 | S30 |
| <sup>1</sup> H NMR of <i>E/Z</i> -27 | S31 |

## GENERAL EXPERIMENTAL METHODS

THF was distilled over LiAlH<sub>4</sub> and then over sodium, and CH<sub>2</sub>Cl<sub>2</sub> was distilled over CaCl<sub>2</sub>. DMF and CH<sub>3</sub>CN were obtained from commercial sources and were used without further purification. For reactions that were performed under a nitrogen atmosphere, glassware was flame dried under vacuum. Dry sodium hydride (95%) was used for the reactions, fluorinating reagent NFSI was obtained from Honeywell and fluorinating reagent Selectfluor was obtained from Air Products (both, NFSI and Selectfluor are commercially available). Ethyl (1,3-benzothiazol-2-ylsulfanyl)acetate (**10**),<sup>1</sup> (1-phenyl-1*H*-tetrazol-5-ylsulfanyl)acetonitrile (**2b**),<sup>2</sup> (1-Boc-imidazole-4-carboxaldehyde)<sup>3</sup> and 1-Boc-indole-3-carboxaldehyde<sup>3,4</sup> are known compounds and were synthesized as reported. Our syntheses of (1,3-benzothiazol-2-ylsulfanyl)acetonitrile (**2a**)<sup>5</sup> and ethyl (1,3-benzothiazol-2-ylsulfanyl)fluoroacetate (**8**)<sup>6</sup> described herein are minor modifications of reported literature procedures. All other reagents were obtained from commercial sources and used without further purification. Thin layer chromatography was performed on 250 μm silica plates and column chromatographic purifications were performed on 200-300 mesh silica gel. For products **25–27**, KMnO<sub>4</sub> stain<sup>7</sup> was used for TLC detection. <sup>1</sup>H NMR spectra were recorded at 500 MHz in CDCl<sub>3</sub> and were referenced to residual CHCl<sub>3</sub> or to tetramethylsilane (TMS). <sup>13</sup>C NMR spectrum of **4** was recorded at 125 MHz and was referenced to CDCl<sub>3</sub> (see page S15). <sup>19</sup>F NMR spectra were recorded at 282 MHz using CFCl<sub>3</sub> as internal standard. Chemical shifts (δ) are reported in parts per million and coupling constants (*J*) are in hertz.

### (1,3-Benzothiazol-2-ylsulfanyl)acetonitrile (**2a**).<sup>5</sup>

To a solution of bromoacetonitrile (**1**, 1.00 g, 8.34 mmol, 1 molar equiv) in DMF (17.5 mL) at rt, the sodium salt of 2-mercapto-1,3-benzothiazole (2.05 g, 10.8 mmol, 1.3 molar equiv) was added and the reaction mixture was allowed to stir for 3 h (TLC showed complete consumption of the starting material). The reaction mixture was diluted with water and extracted with EtOAc (3x). The combined organic layer was thoroughly washed with water and brine, dried over anhydrous Na<sub>2</sub>SO<sub>4</sub> and the solvent was evaporated under reduced pressure. The crude product was purified by column chromatography on silica gel using CH<sub>2</sub>Cl<sub>2</sub> to yield **2a** as white solid (1.52 g, 89%). Mp (recrystallized from 10% EtOAc in hexanes) 78-79 °C. <sup>1</sup>H NMR (500 MHz): δ 7.94 (d, 1H, Ar-H, *J* = 8.2), 7.80 (d, 1H, Ar-H, *J* = 7.9), 7.47 (t, 1H, Ar-H, *J* = 7.6), 7.36 (t, 1H, Ar-H, *J* = 7.6), 4.20 (s, 2H, CH<sub>2</sub>CN). HRMS (positive ion ESI): calcd. for C<sub>9</sub>H<sub>6</sub>N<sub>2</sub>S<sub>2</sub>Na<sup>+</sup> (*M*<sup>+</sup> + Na) 228.986461, found 228.985874.

### **Ethyl (1,3-Benzothiazol-2-ylsulfanyl)fluoroacetate (8) from Commercial Fluorinated Precursor 7.**<sup>6</sup>

To a solution of ethyl bromofluoroacetate (**7**, 3.00 g, 16.2 mmol, 1 molar equiv) in DMF (40.0 mL) at rt, the sodium salt of 2-mercapto-1,3-benzothiazole (3.15 g, 16.6 mmol, 1.03 molar equiv) was added and the reaction mixture was allowed to stir for 1 h (TLC showed complete consumption of the starting material). The reaction mixture was diluted with water and extracted with EtOAc (3x). The combined organic layer was thoroughly washed with water and brine, dried over anhydrous Na<sub>2</sub>SO<sub>4</sub> and the solvent was evaporated under reduced pressure. The crude product was purified by column chromatography on silica gel using CH<sub>2</sub>Cl<sub>2</sub> to yield **8** as a clear thick pale yellow liquid (3.89 g, 88%). For characterization data please refer to synthesis of **8** via fluorination of **10** in the Experimental Section of the paper.

### **(1,3-Benzothiazol-2-ylsulfanyl)fluoroacetonitrile (6a).**<sup>5</sup>

For analytical purposes, a small sample of crude **6a** was purified by column chromatography (SiO<sub>2</sub>, 50% ethyl acetate in hexanes). White solid, mp (recrystallized from 3% EtOAc in hexanes) 48-49 °C. <sup>1</sup>H NMR (500 MHz): δ 8.01 (d, 1H, Ar-H, *J* = 7.9), 7.85 (d, 1H, Ar-H, *J* = 7.9), 7.52 (t, 1H, Ar-H, *J* = 7.6), 7.43 (t, 1H, Ar-H, *J* = 7.6), 7.31 (d, 1H, CHF, <sup>2</sup>*J*<sub>FH</sub> = 49.4). <sup>19</sup>F NMR (282 MHz): δ -156.9 (d, <sup>2</sup>*J*<sub>FH</sub> = 48.8). HRMS (positive ion ESI): calcd. for C<sub>9</sub>H<sub>5</sub>FN<sub>2</sub>S<sub>2</sub>H<sup>+</sup> (M<sup>+</sup> + H) 224.995094, found 224.994774.

### **(1-Phenyl-1H-tetrazol-5-ylsulfanyl)fluoroacetonitrile (6b).**<sup>2</sup>

A stirred solution of (1-phenyl-1H-tetrazol-5-ylsulfanyl)acetonitrile (**2b**, 0.600 g, 2.76 mmol, 1 molar equiv) in dry toluene (24 mL), was cooled to -78 °C (dry-ice/*iso*-PrOH) and under nitrogen, *t*-BuLi (1.79 mL of a 1.7 M solution in pentane, 3.04 mmol, 1.1 molar equiv) was added to the reaction mixture. After 12 min solid NFSI (1.05 g, 3.32 mmol, 1.2 molar equiv) was added. The mixture was allowed to stir at -78 °C for 50 min, then warmed to rt and stirring was continued for an additional 1 h. Sat aq NH<sub>4</sub>Cl was added to the mixture and the layers were separated. The aqueous layer was extracted with EtOAc (3x), and the combined organic layer was washed with sat aq NaHCO<sub>3</sub> and brine. The organic layer was dried over Na<sub>2</sub>SO<sub>4</sub> and the solvent was evaporated under reduced pressure. The <sup>1</sup>H NMR of the crude reaction mixture showed the presence of starting **2b** and monofluoro derivative **6b**, and <sup>19</sup>F NMR showed monofluoro **6b** and difluoro derivative. Purification of the crude reaction mixture by column chromatography (silica gel, eluted by CH<sub>2</sub>Cl<sub>2</sub>) afforded **6b** as a thick, pale-reddish liquid (0.294

g, 45%).  $^1\text{H}$  NMR (500 MHz):  $\delta$  7.64-7.62 (m, 3H, Ar-H), 7.52-7.50 (m, 2H, Ar-H), 7.27 (d, 1H, CHF,  $^2J_{\text{FH}} = 48.8$ ).  $^{19}\text{F}$  NMR (282 MHz):  $\delta$  -157.7 (d,  $^2J_{\text{FH}} = 47.0$ ).

**Table 1.**  $^{19}\text{F}$  NMR data and HRMS data (or lit. reference for known compounds) of **12–27**.

| Compound                                                                                                   | $^{19}\text{F}$ NMR data ( $\text{CDCl}_3$ )                                                                                               | Ionization method and HRMS data or lit. reference                                                                                                                                   |
|------------------------------------------------------------------------------------------------------------|--------------------------------------------------------------------------------------------------------------------------------------------|-------------------------------------------------------------------------------------------------------------------------------------------------------------------------------------|
| <b>E- and Z-12.</b><br>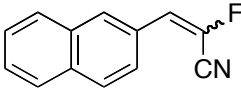   | 282 MHz: $\delta$ -122.5 (d, $^3J_{\text{FH}} = 15.3$ , <i>E</i> isomer), $\delta$ -122.1 (d, $^3J_{\text{FH}} = 36.6$ , <i>Z</i> isomer)  | HRMS (positive ion APPI):<br>calcd. for $\text{C}_{13}\text{H}_8\text{FN}^+$ ( $\text{M}^+$ )<br>197.063529, found<br>197.063385                                                    |
| <b>E- and Z-13.</b><br>   | 282 MHz: $\delta$ -121.9 (d, $^3J_{\text{FH}} = 35.2$ , <i>Z</i> isomer), $\delta$ -122.6 (d, $^3J_{\text{FH}} = 17.6$ , <i>E</i> isomer)  | Lit. ref.: 8, 9                                                                                                                                                                     |
| <b>E- and Z-14.</b><br>  | 282 MHz: $\delta$ -126.2 (d, $^3J_{\text{FH}} = 36.6$ , <i>Z</i> isomer), $\delta$ -127.1 (d, $^3J_{\text{FH}} = 18.3$ , <i>E</i> isomer)  | Lit. ref.: 9, 10                                                                                                                                                                    |
| <b>E- and Z-15.</b><br> | 282 MHz: $\delta$ -122.3 (d, $^3J_{\text{FH}} = 15.3$ , <i>E</i> isomer), $\delta$ -124.11 (d, $^3J_{\text{FH}} = 36.6$ , <i>Z</i> isomer) | HRMS (positive ion ESI):<br>Exact mass of sodiated dimer<br>calcd. for $(\text{C}_{10}\text{H}_8\text{FNO})_2\text{Na}^+$ ( $\text{M}_2^+$<br>+ Na) 377.107205, found<br>377.107102 |
| <b>E- and Z-16.</b><br> | 282 MHz: $\delta$ -120.4 (d, $^3J_{\text{FH}} = 15.3$ , <i>E</i> isomer), $\delta$ -123.0 (d, $^3J_{\text{FH}} = 36.6$ , <i>Z</i> isomer)  | HRMS (positive ion APPI):<br>calcd. for $\text{C}_{10}\text{H}_8\text{FN}^+$ ( $\text{M}^+$ )<br>161.063529, found<br>161.063284                                                    |
| <b>E- and Z-17.</b><br> | 282 MHz: $\delta$ -115.3 (d, $^3J_{\text{FH}} = 15.3$ , <i>E</i> isomer), $\delta$ -115.7 (d, $^3J_{\text{FH}} = 33.6$ , <i>Z</i> isomer)  | Lit. ref.: 10                                                                                                                                                                       |
| <b>E- and Z-18.</b>                                                                                        | 282 MHz: $\delta$ -117.0 (d, $^3J_{\text{FH}} = 12.2$ , <i>E</i> isomer), $\delta$ -120.1 (d, $^3J_{\text{FH}} = 30.5$ , <i>Z</i> isomer)  | Lit. ref.: 10                                                                                                                                                                       |

|                                                                                                            |                                                                                                                                                                                                                     |                                                                                                          |
|------------------------------------------------------------------------------------------------------------|---------------------------------------------------------------------------------------------------------------------------------------------------------------------------------------------------------------------|----------------------------------------------------------------------------------------------------------|
| 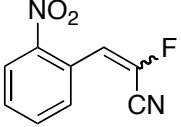                          |                                                                                                                                                                                                                     |                                                                                                          |
| <b>E- and Z-19.</b><br>   | 282 MHz: $\delta$ -118.8 (d, $^3J_{FH} = 15.3$ , <i>E</i> isomer), $\delta$ -114.3 (s, Ar-F, <i>E</i> isomer), $\delta$ -119.8 (d, $^3J_{FH} = 36.6$ , <i>Z</i> isomer), $\delta$ -114.7 (s, Ar-F, <i>Z</i> isomer) | HRMS (EI): calcd. for $C_9H_5F_2N^+$ ( $M^+$ ) 165.0390, found 165.0402                                  |
| <b>E- and Z-20.</b><br>   | 282 MHz: $\delta$ -122.8 (d, $^3J_{FH} = 29.4$ , <i>Z</i> isomer), $\delta$ -129.0 (d, $^3J_{FH} = 11.7$ , <i>E</i> isomer)                                                                                         | HRMS (positive ion APPI): calcd. for $C_7H_4FNS^+$ ( $M^+$ ) 153.004299, found 153.004145                |
| <b>E- and Z-21.</b><br>  | 282 MHz: $\delta$ -117.9 (d, $^3J_{FH} = 33.6$ , <i>Z</i> isomer), $\delta$ -125.3 (d, $^3J_{FH} = 15.3$ , <i>E</i> isomer)                                                                                         | HRMS (positive ion ESI): calcd. for $C_{11}H_{12}FN_3O_2Na^+$ ( $M^+$ + Na) 260.080576, found 260.080458 |
| <b>E- and Z-22.</b><br> | 282 MHz: $\delta$ -119.2 (d, $^3J_{FH} = 33.6$ , <i>Z</i> isomer), $\delta$ -125.9 (d, $^3J_{FH} = 12.2$ , <i>E</i> isomer)                                                                                         | HRMS (positive ion ESI): calcd. for $C_{16}H_{15}FN_2O_2Na^+$ ( $M^+$ + Na) 309.100977, found 309.100939 |
| <b>E- and Z-23.</b><br> | 282 MHz: $\delta$ -128.5 (d, $^3J_{FH} = 35.2$ , <i>Z</i> isomer), $\delta$ -129.6 (d, $^3J_{FH} = 17.6$ , <i>E</i> isomer)                                                                                         | HRMS (positive ion ESI): calcd. for $C_{13}H_{10}FFeN^+$ ( $M^+$ ) 255.014121, found 255.014173          |
| <b>E- and Z-24.</b><br> | 282 MHz: $\delta$ -126.6 (d, $^3J_{FH} = 30.5$ , <i>Z</i> isomer), $\delta$ -127.7 (d, $^3J_{FH} = 12.2$ , <i>E</i> isomer)                                                                                         | Lit. ref.: 8, 9                                                                                          |
| <b>E- and Z-25.</b><br> | 282 MHz: $\delta$ -123.9 (d, $^3J_{FH} = 11.8$ , <i>E</i> isomer), $\delta$ -125.8 (d, $^3J_{FH} = 35.2$ , <i>Z</i> isomer)                                                                                         | HRMS (positive ion APPI): calcd. for $C_{10}H_{15}FN^+$ ( $M^+$ ) 168.118304, found 168.118068           |

|                                                                                                              |                                                                                                                                                                                        |                                                                                                               |
|--------------------------------------------------------------------------------------------------------------|----------------------------------------------------------------------------------------------------------------------------------------------------------------------------------------|---------------------------------------------------------------------------------------------------------------|
| <p><b>E- and Z-26.</b></p> 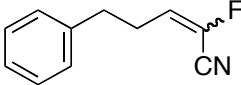 | <p>282 MHz: <math>\delta</math> -122.6 (d, <math>^3J_{FH} = 14.7</math>,<br/> <i>E</i> isomer), <math>\delta</math> -124.2 (d, <math>^3J_{FH} = 32.3</math>,<br/> <i>Z</i> isomer)</p> | <p>Lit. ref.: 9</p>                                                                                           |
| <p><b>E- and Z-27.</b></p>  | <p>282 MHz: <math>\delta</math> -122.8 (d, <math>^3J_{FH} = 15.3</math>,<br/> <i>E</i> isomer), <math>\delta</math> -125.6 (d, <math>^3J_{FH} = 30.5</math>,<br/> <i>Z</i> isomer)</p> | <p>HRMS (EI): calcd. for<br/> <math>C_8H_{12}FN^+</math> (<math>M^+</math>) 141.0954,<br/> found 141.0955</p> |

### TLC Separation of *E/Z* Mixtures 12, 14, 16, 17, 21 and 26

(*E/Z*)-12: SiO<sub>2</sub>, 10% EtOAc in hexanes:  $R_f = 0.42$ ;  $R_f = 0.49$

(*E/Z*)-14: SiO<sub>2</sub>, 15% EtOAc in hexanes:  $R_f = 0.38$ ;  $R_f = 0.42$

(*E/Z*)-16: SiO<sub>2</sub>, hexanes:  $R_f = 0.17$ ;  $R_f = 0.26$

(*E/Z*)-17: SiO<sub>2</sub>, 25% EtOAc in hexanes:  $R_f = 0.64$ ;  $R_f = 0.68$

(*E/Z*)-21: SiO<sub>2</sub>, 25% EtOAc in hexanes:  $R_f = 0.23$ ;  $R_f = 0.28$

(*E/Z*)-26: SiO<sub>2</sub>, 10% EtOAc in hexanes:  $R_f = 0.44$ ;  $R_f = 0.67$

### REFERENCES

1. Blakemore, P. R.; Ho, D. K. H.; Nap, W. M. *Org. Biomol. Chem.* **2005**, *3*, 1365-1368.
2. Zagipa, B.; Nagura, H.; Fuchigami, T. *J. Fluorine Chem.* **2007**, *128*, 1168-1173.
3. Kimura, R.; Nagano, T.; Kinoshita, H. *Bull. Chem. Soc. Jpn.* **2002**, *75*, 2517-2525.
4. Wasser, J.; Gaspar, B.; Nambu, H.; Carreira, E. M. *J. Am. Chem. Soc.* **2006**, *128*, 11693-11712.
5. Hou, Y.; Higashiya, S.; Fuchigami, T. *J. Org. Chem.* **1997**, *62*, 9173-9176.
6. Pfund, E.; Lebargy, C.; Rouden, J.; Lequeux, T. *J. Org. Chem.* **2007**, *72*, 7871-7877.
7. <http://www.ux1.eiu.edu/~cfthb/research/handbook/TLCstains.htm>
8. Xu, Z.-Q.; DesMarteau, D. D. *J. Chem. Soc., Perkin Trans. I* **1992**, 313-315.
9. van Steenis, J. H.; van den Nieuwendijk, A. M. C. H.; van der Gen, A. *J. Fluorine Chem.* **2004**, *125*, 107-117.
10. Patrick, T. B.; Nadji, S. *J. Fluorine Chem.* **1990**, *49*, 147-150.

Pulse Sequence: s2pul  
Solvent: CDCl3  
Temp. 25.0 C / 298.1 K  
Operator: barbara  
File: 1222-MS-03-229-Bt-sulfide  
INOVA-500 "riga"

Relax. delay 4.000 sec  
Pulse 45.0 degrees  
Acq. time 1.892 sec  
Width 10000.0 Hz  
32 repetitions  
OBSERVE E1, 499.7707208 MHz  
DATA PROCESSING  
Line broadening 0.5 Hz  
FT size 65536  
Total time 3 min, 8 sec

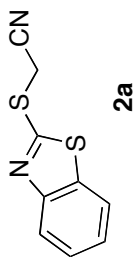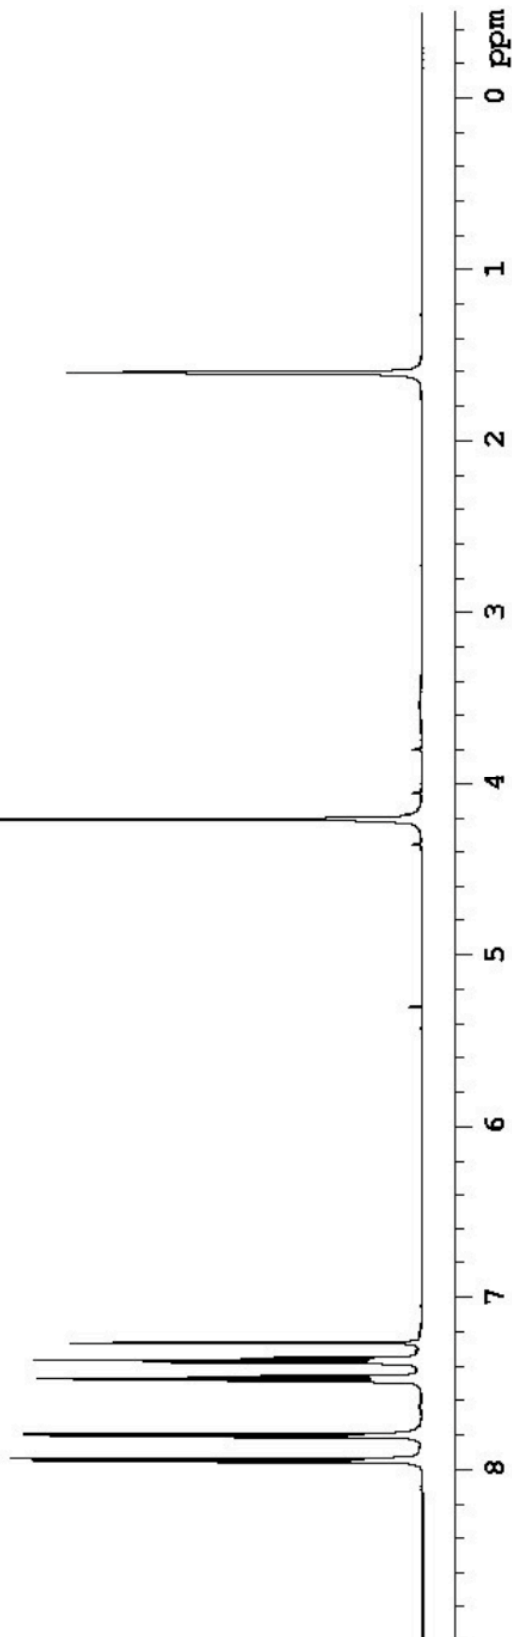



Pulse Sequence: s2pul

Solvent: CDCl3

Temp. 25.0 C / 298.1 K

Operator: barbara

File: 1222-MS-03-235-Bt-sulfone  
INOVA-500 "riga"

Relax. delay 4.000 sec

Pulse 45.0 degrees

Acq. time 1.892 sec

Width 10000.0 Hz

32 repetitions

OBSERVE E1, 499.7707211 MHz

DATA PROCESSING

Line broadening 0.5 Hz

FT size 65536

Total time 3 min, 8 sec

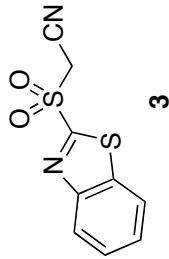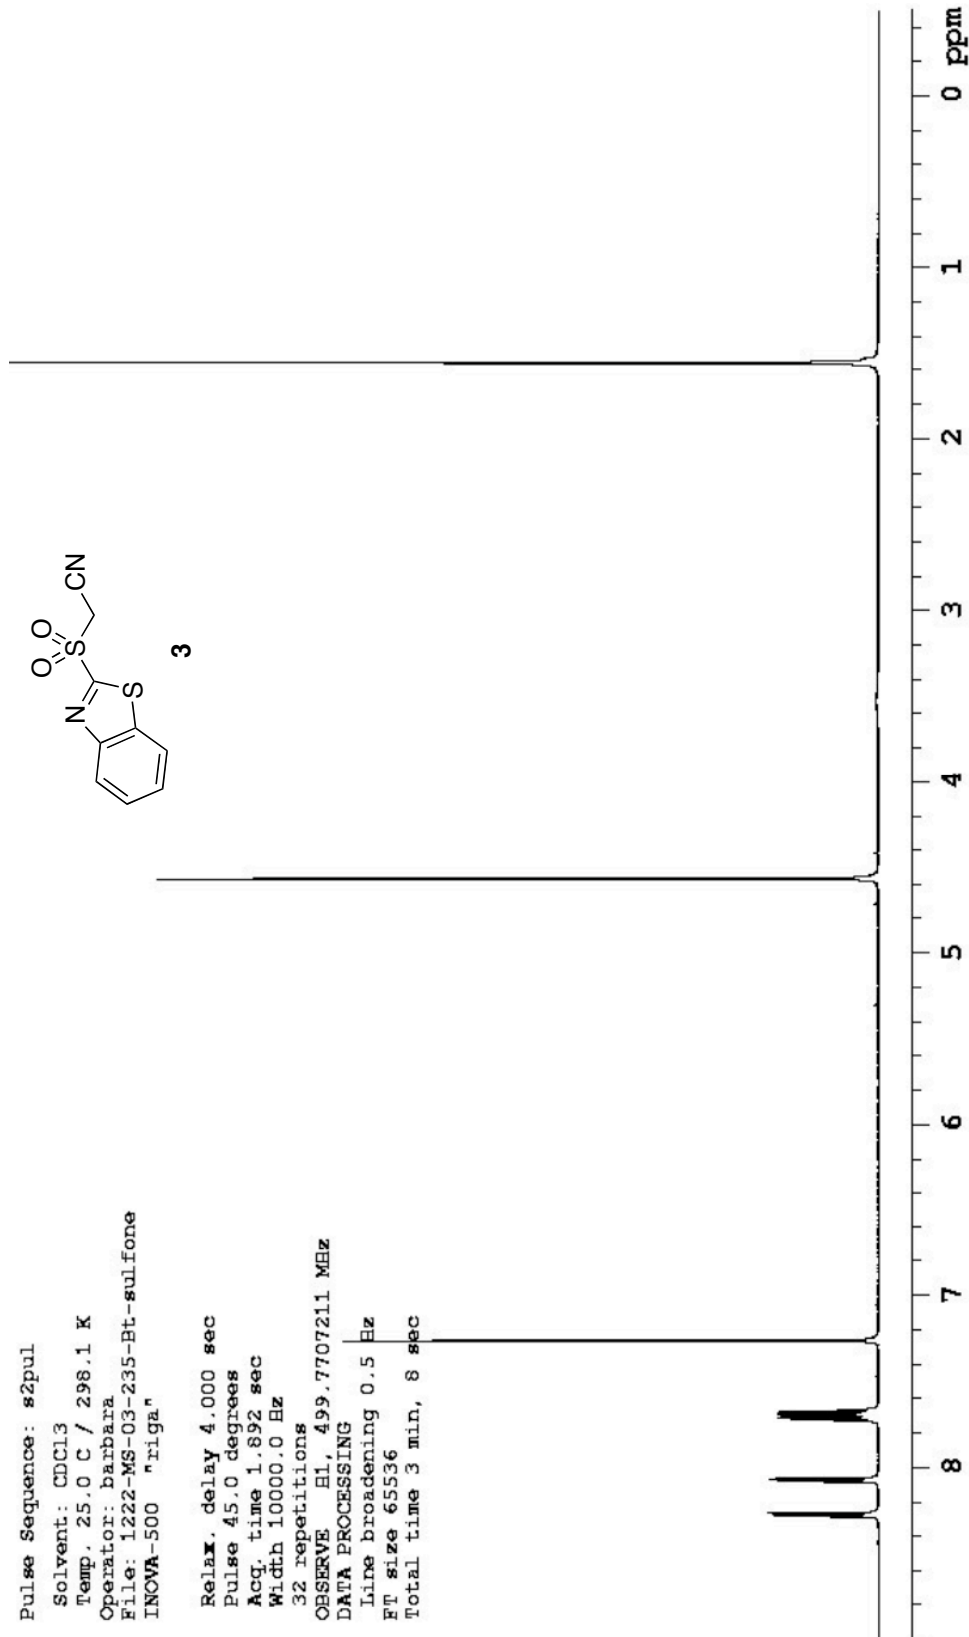

Pulse Sequence: s2pul

Solvent: CDCl3  
Temp. 25.0 C / 298.1 K  
Operator: barbara  
File: 1222-MS-03-246-ester  
INOVA-500 "ruga"

Relax. delay 4.000 sec  
Pulse 45.0 degrees  
Acq. time 1.892 sec  
Width 10000.0 Hz  
32 repetitions  
OBSERVE E1, 499.7707214 MHz  
DATA PROCESSING  
Line broadening 0.5 Hz  
FT size 65536  
Total time 3 min, 8 sec

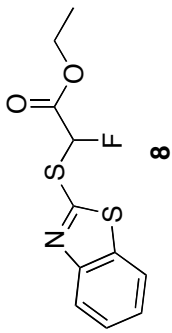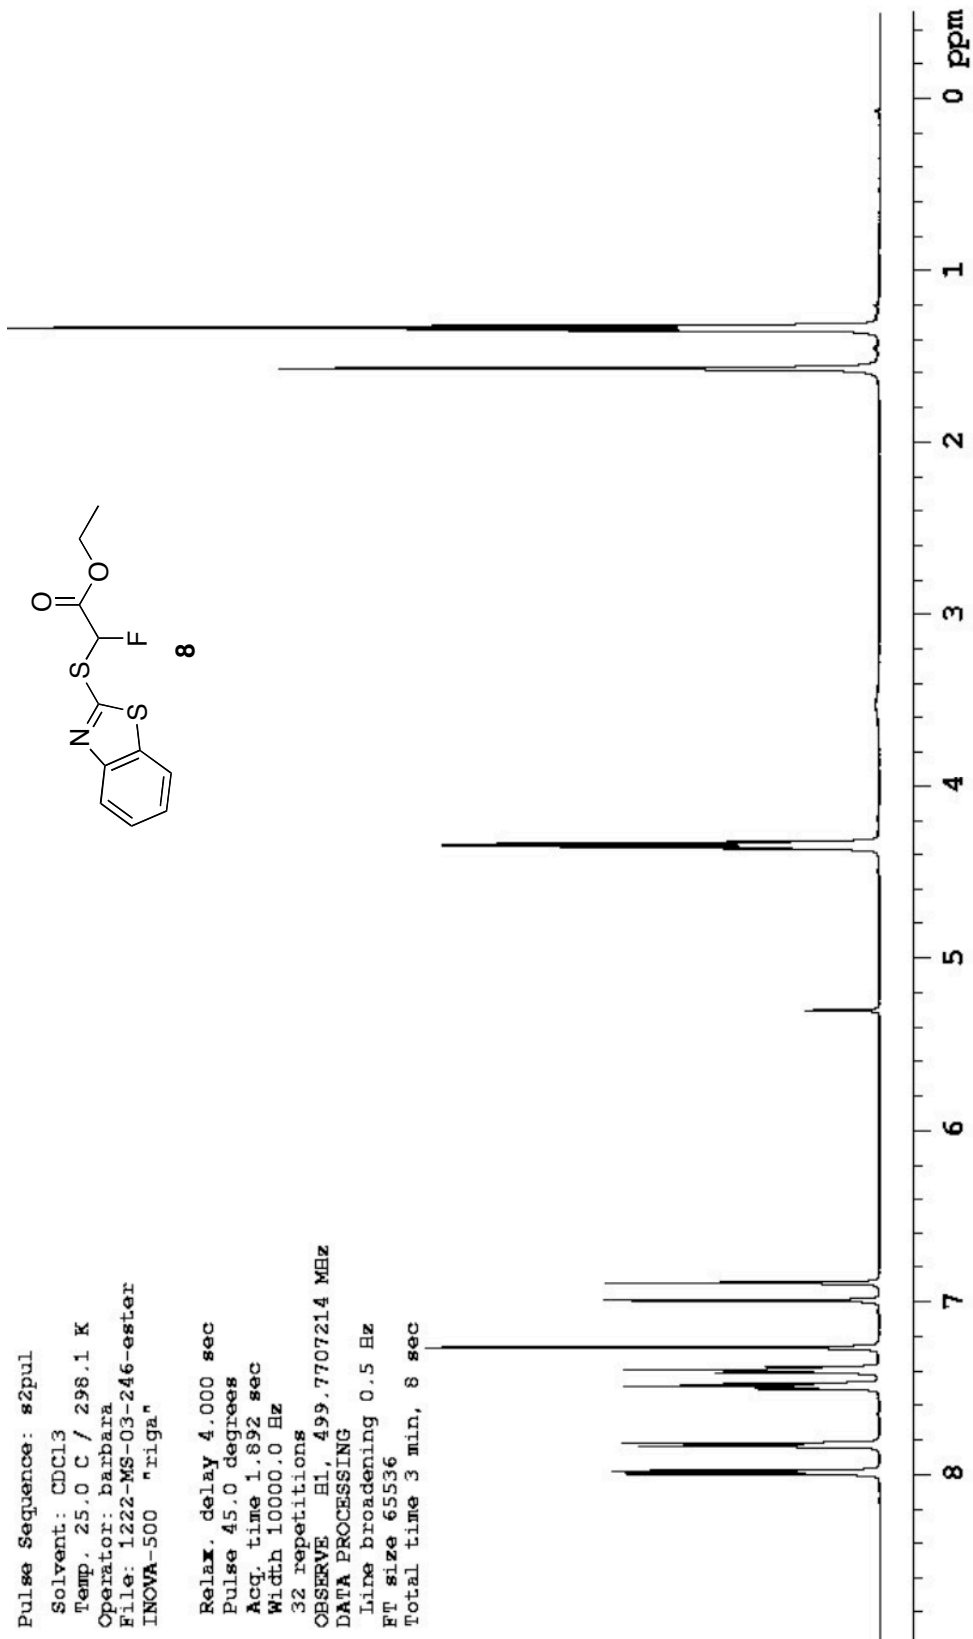

Pulse Sequence: s2pul

Solvent: CDCl3  
Temp. 25.0 C / 298.1 K  
Operator: barbara  
File: 1222-MS-03-241-amide  
INOVA-500 "riga"

Relax. delay 4.000 sec  
Pulse 45.0 degrees  
Acq. time 1.892 sec  
Width 10000.0 Hz  
32 repetitions  
OBSERVE H1, 499.7707208 MHz  
DATA PROCESSING  
Line broadening 0.1 Hz  
FT size 65536  
Total time 3 min, 8 sec

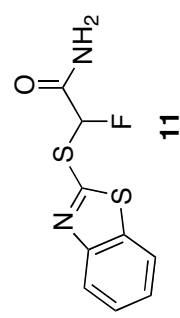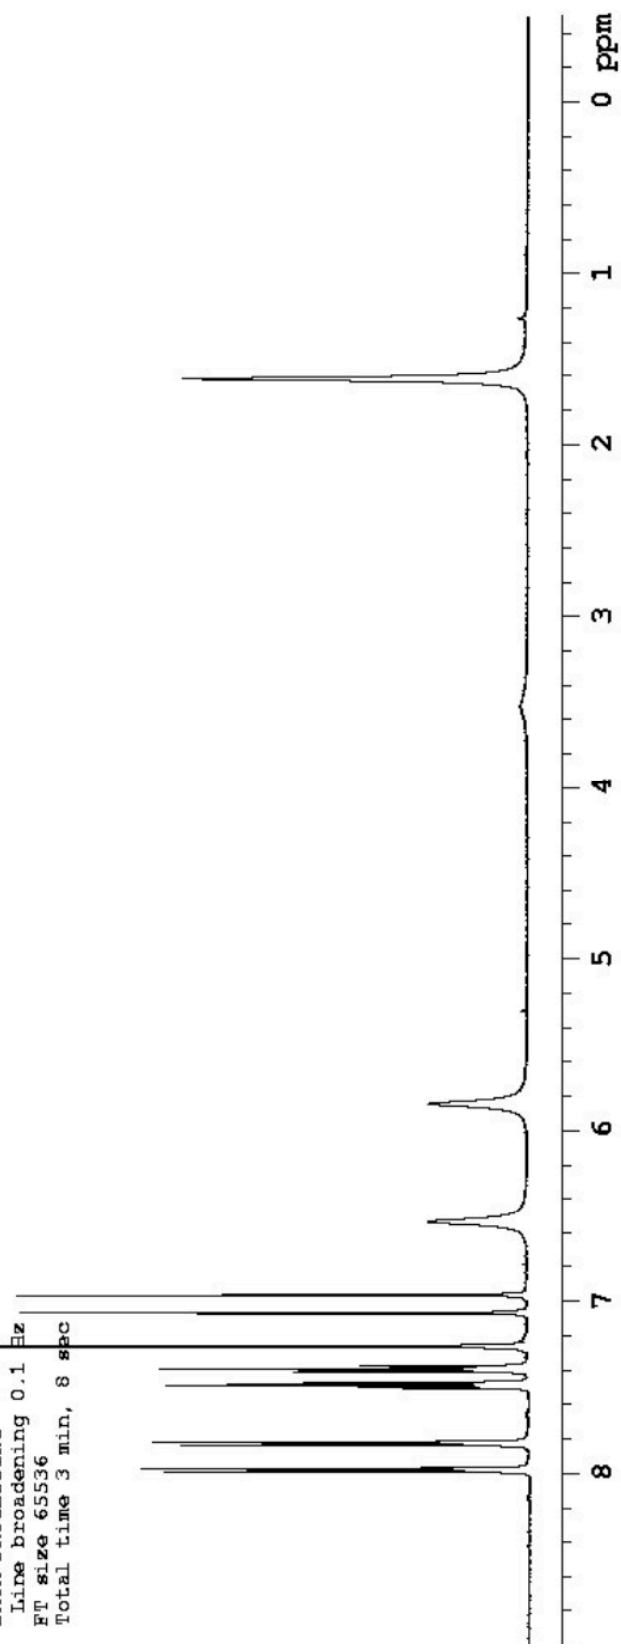

Pulse Sequence: s2pul

Solvent: CDCl3  
Temp. 25.0 C / 298.1 K  
Operator: barbara  
File: 1222-MS-03-244-pure  
INOVA-500 "riga"

Relax. delay 4.000 sec  
Pulse 45.0 degrees  
Acq. time 1.892 sec  
Width 10000.0 Hz  
32 repetitions  
OBSERVE E1, 499.7707223 MHz  
DATA PROCESSING  
Line broadening 0.5 Hz  
FT size 65536  
Total time 3 min, 8 sec

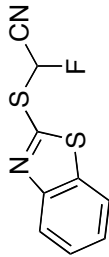

6a

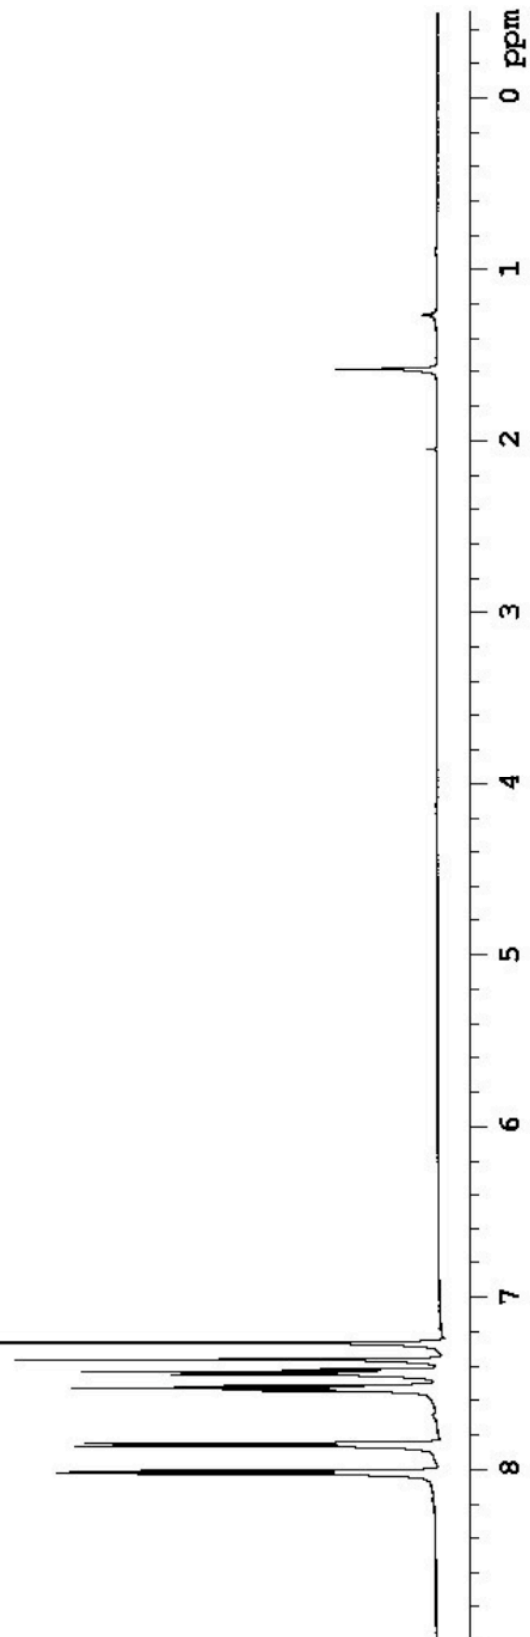

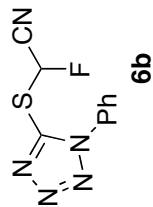

Pulse Sequence: s2pul  
Solvent: cdcl3  
Temp. 25.0 C / 298.1 K  
Operator: barbara

Relax. delay 1.000 sec  
Pulse 45.0 degrees  
Acq. time 1.892 sec  
Width 7544.3 Hz  
32 repetitions

OBSERVE H1, 499.7707212 MHz  
DATA PROCESSING  
Line broadening 0.5 Hz  
FT size 32768  
Total time 1 min

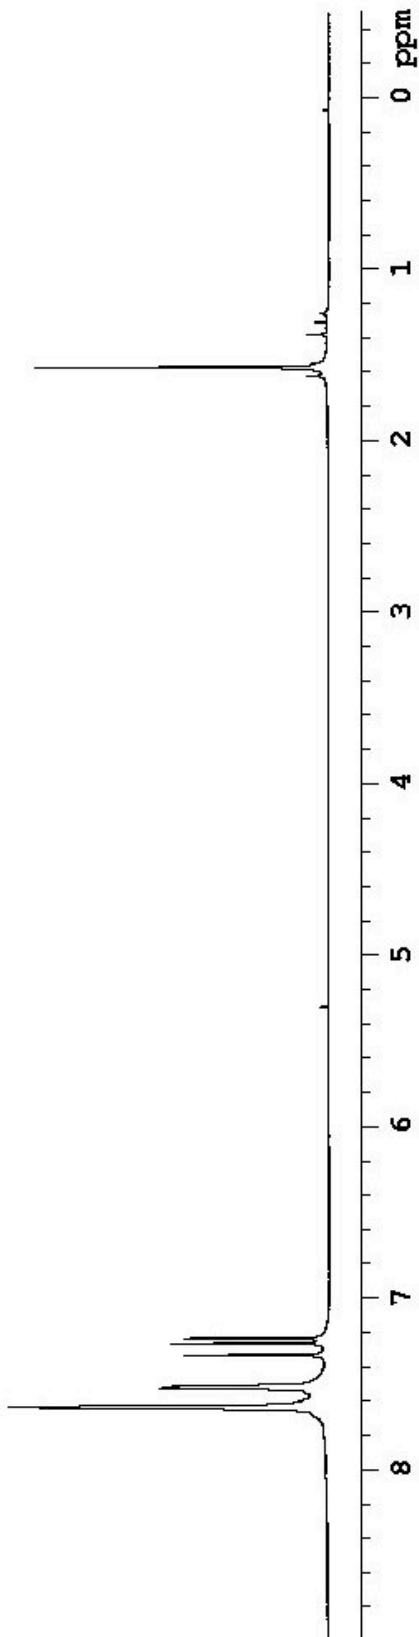

Pulse Sequence: s2pul  
Solvent: CDCl3  
Temp. 25.0 C / 298.1 K  
Operator: barbara  
File: 1222-MS-03-248-Fsulfone  
INOVA-500 "riga"

Relax. delay 4.000 sec  
Pulse 45.0 degrees  
Acq. time 1.892 sec  
Width 10000.0 Hz  
32 repetitions  
OBSERVE E1, 499.7707214 MHz  
DATA PROCESSING  
Line broadening 0.5 Hz  
Ft size 65536  
Total time 3 min, 8 sec

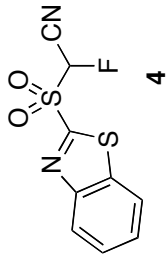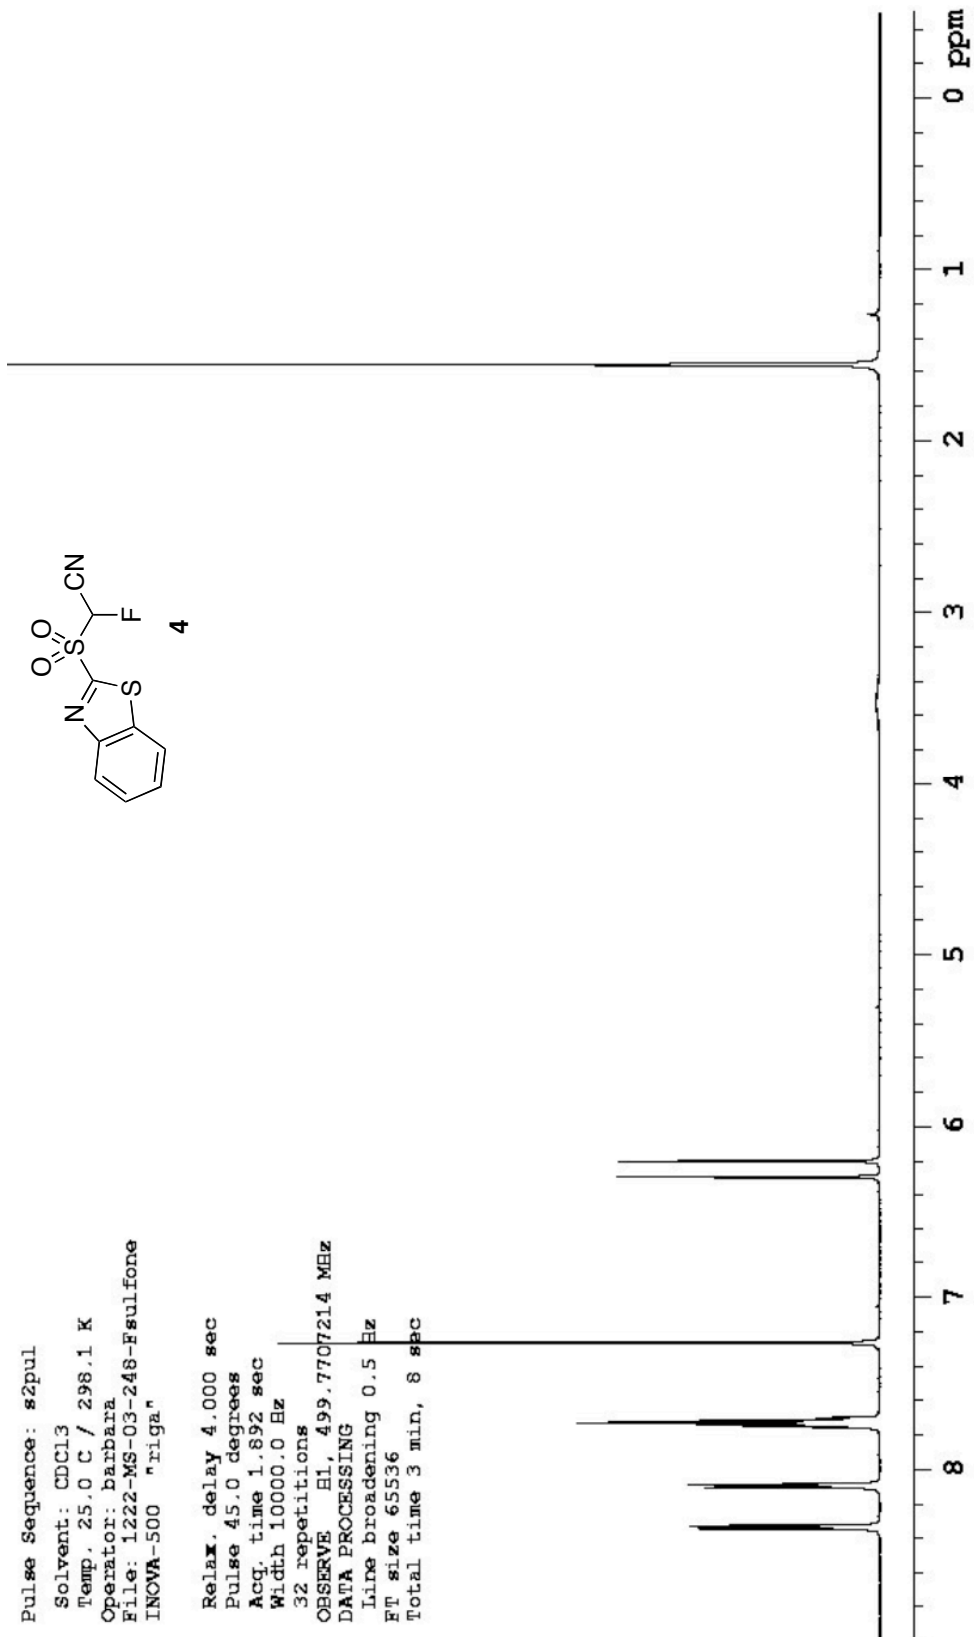

Data Collected on:  
 capella500-inova500  
 Archive directory:  
 /export/home/barbara/vnmrSYS/data  
 Sample directory:

File: 1222-MS-05-408-pure-13C

Pulse Sequence: s2pul  
 Solvent: CDCl3  
 Temp. 25.0 C / 298.1 K  
 Operator: barbara

Relax. delay 1.000 sec  
 Pulse 45.0 degrees  
 Acq. time 1.300 sec  
 Width 31421.8 Hz  
 984 repetitions

OBSERVE C13, 125.6674484 MHz  
 DECOUPLE H1, 499.7732084 MHz

Power 38 dB  
 continuously on  
 WALTZ-16 modulated  
 DATA PROCESSING  
 Line broadening 4.0 Hz  
 FT size 131072  
 Total time 39 min

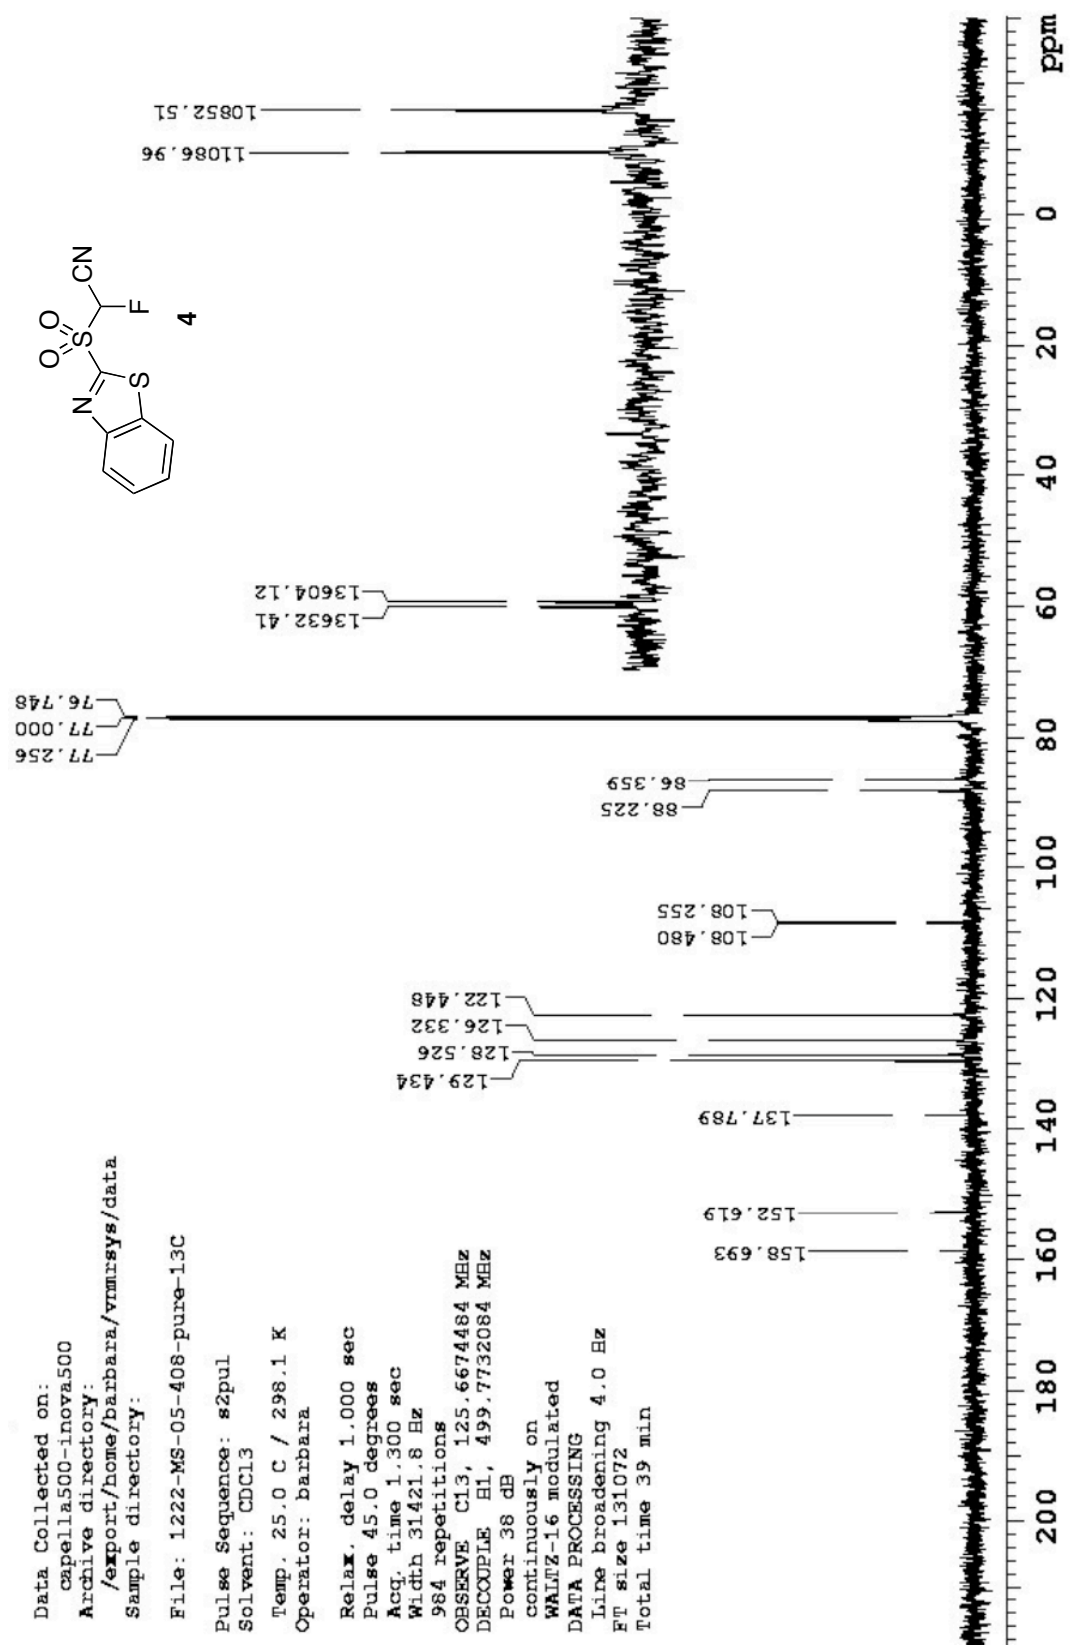

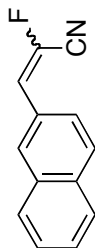

12

Pulse Sequence: s2pul  
Solvent: cdcl3  
Temp. 25.0 C / 298.1 K  
Operator: barbara  
File: 1222-MS-04-330-pure  
INOVA-500 "riga"  
Relax. delay 1.000 sec  
Pulse 45.0 degrees  
Acq. time 1.392 sec  
Width 10000.0 Hz  
32 repetitions  
OBSERVE F1, 499.7707224 MHz  
DATA PROCESSING  
Line broadening 0.5 Hz  
FT size 65536  
Total time 1 min, 32 sec

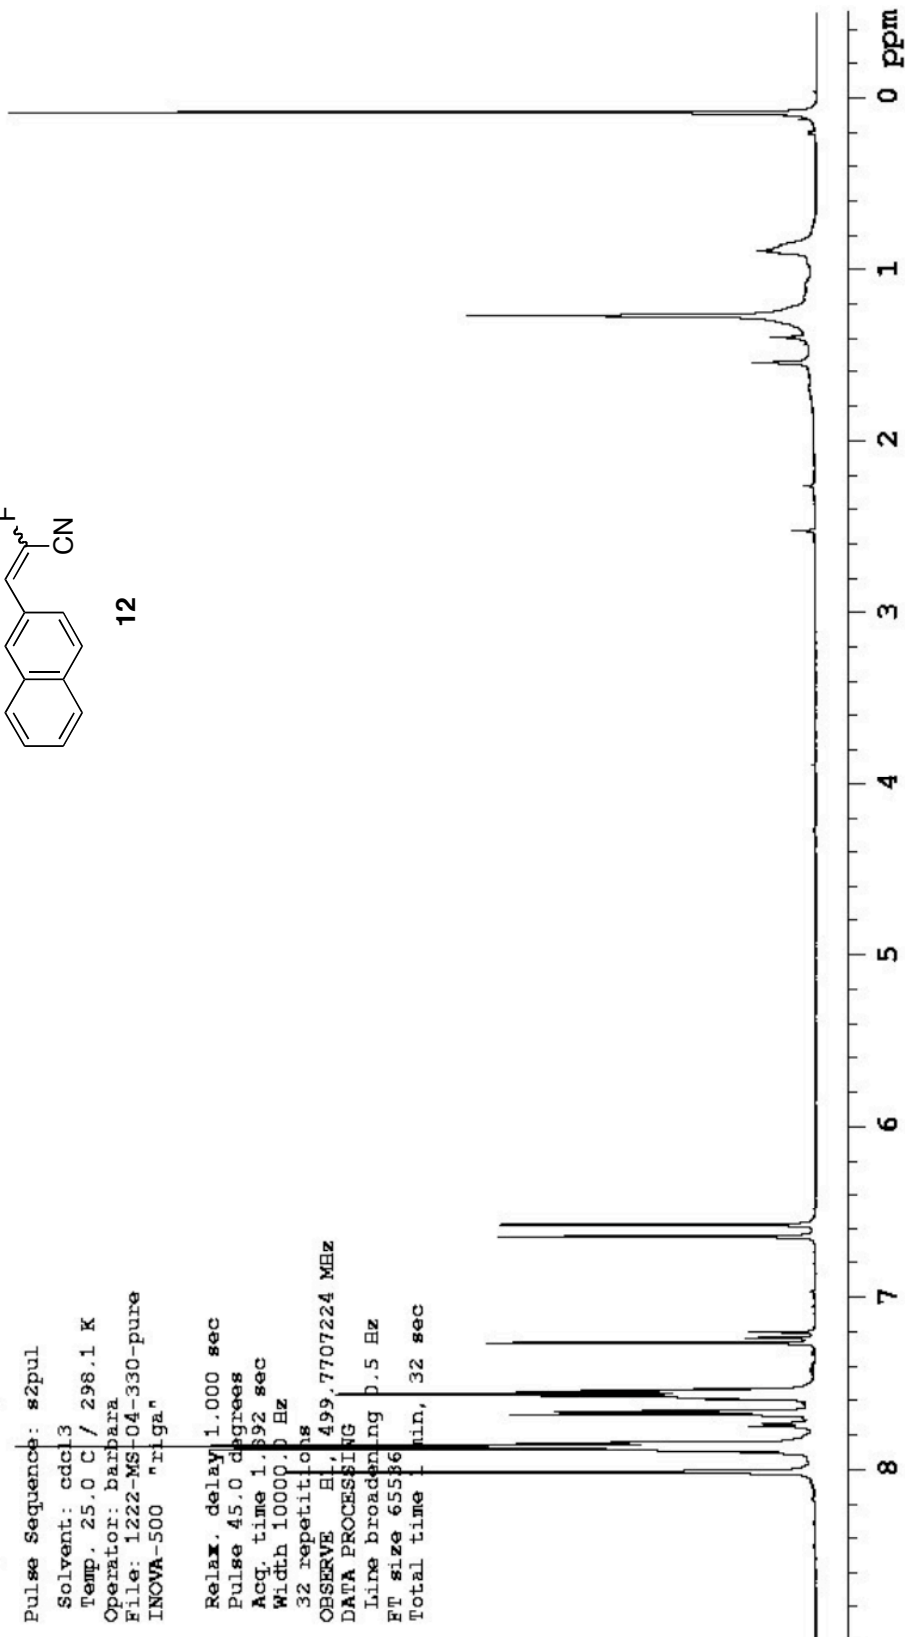



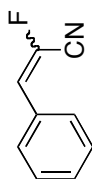

13

Pulse Sequence: s2pul  
Solvent: cdcl3  
Temp. 25.0 C / 298.1 K  
Operator: barbara  
File: 1222-MS-04-319-pure  
INOVA-500 "riga"

Relax. delay 1.000 sec  
Pulse 45.0 degrees  
Acq. time 1.892 sec  
Width 10000.0 Hz  
28 repetitions  
OBSERVE H1, 499.7707095 MHz  
DATA PROCESSING  
F1 size 65536  
Total time 1 min, 32 sec

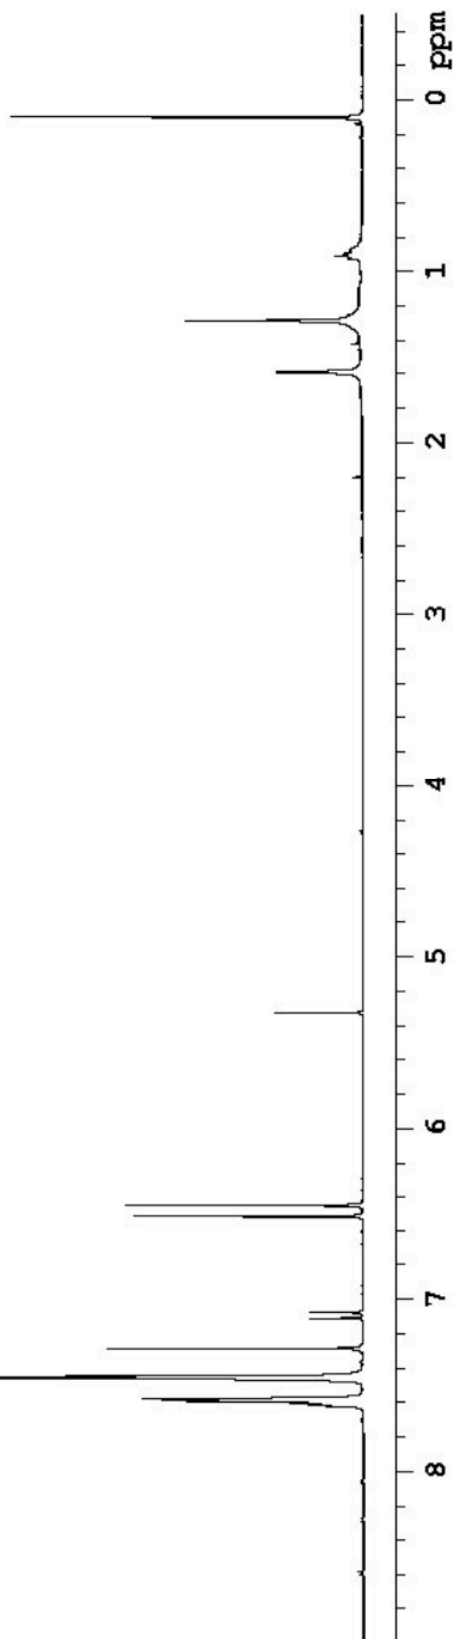

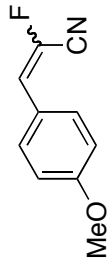

Pulse Sequence: s2pul  
Solvent: cdcl3  
Temp. 25.0 C / 298.1 K  
Operator: barbara  
File: 1222-MS-04-311-pure  
INOVA-500 "riga"

Relax. delay 1.000 sec  
Pulse 45.0 degrees  
Acq. time 1.892 sec  
Width 10000.0 Hz  
32 repetitions  
OBSERVE H1, 499.7707212 MHz  
DATA PROCESSING  
Line broadening 0.5 Hz  
FT size 65536  
Total time 1 min, 32 sec

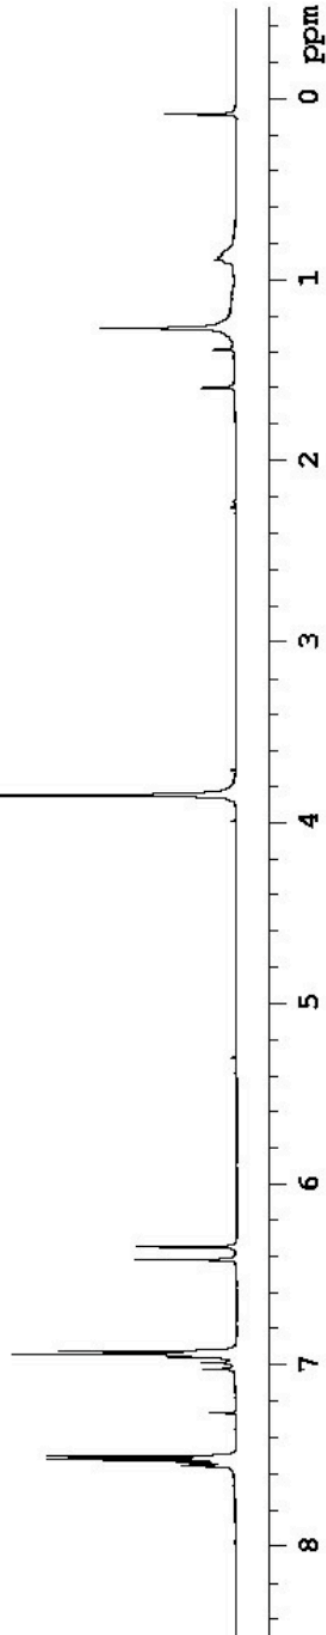

Pulse Sequence: s2pul  
Solvent: cdcl3  
Temp. 25.0 C / 298.1 K  
Operator: barbara  
File: 1222-MS-04-287-pure  
INOVA-500 "riga"

Relax. delay 1.000 sec  
Pulse 45.0 degrees  
Acq. time 1.892 sec  
Width 10000.0 Hz  
32 repetitions  
OBSERVE H1, 499.7707212 MHz  
DATA PROCESSING  
Line broadening 1.0 Hz  
FT size 65536  
Total time 1 min, 32 sec

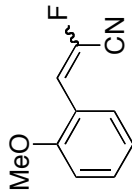

15

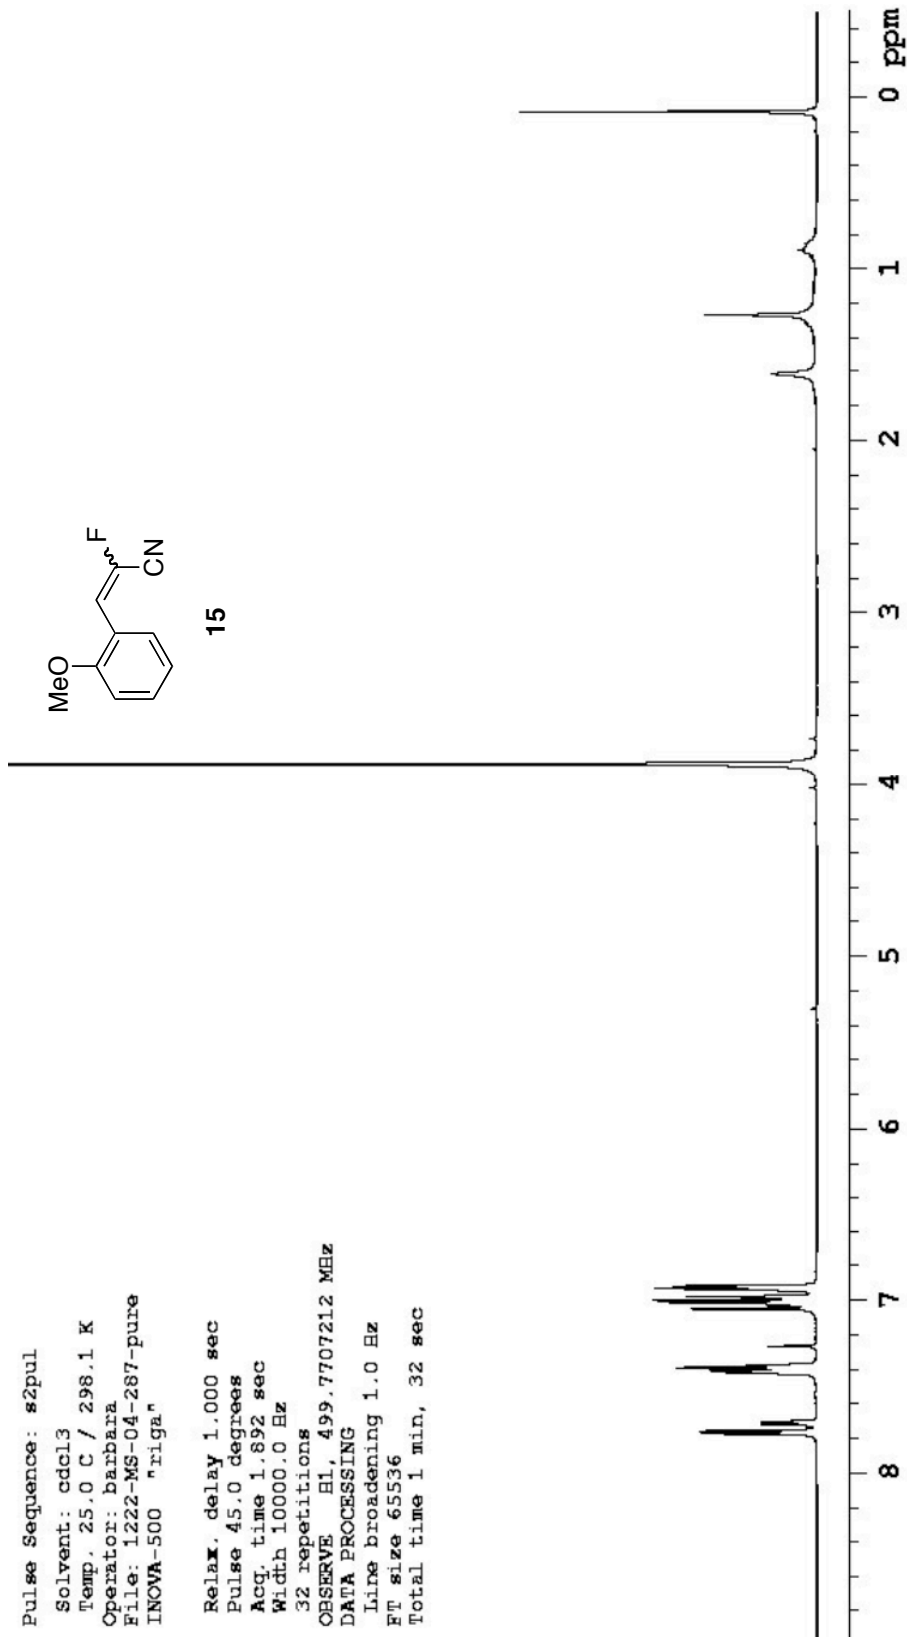

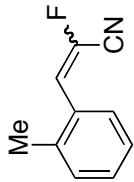

16

Pulse Sequence: s2pul

Solvent: cdcl3

Temp. 25.0 C / 298.1 K

Operator: barbara

File: 1222-MS-03-257

INOVA-500 "riga"

Relax. delay 1.000 sec

Pulse 45.0 degrees

Acq. time 1.892 sec

Width 10000.0 Hz

32 repetitions

OBSERVE El, 499.7707196 MHz

DATA PROCESSING

Line broadening 0.5 Hz

FT size 65536

Total time 1 min, 32 sec

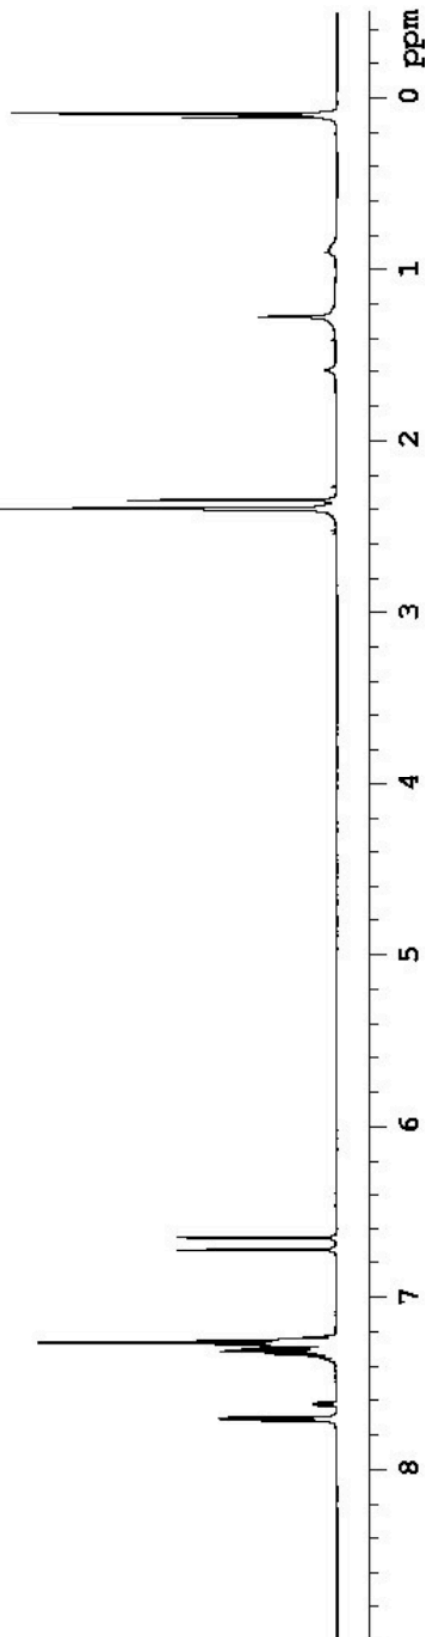

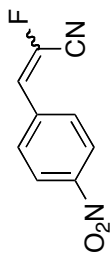

17

Pulse Sequence: s2pul  
Solvent: cdcl3  
Temp. 25.0 C / 298.1 K  
Operator: barbara  
File: 1222-MS-04-283  
INOVA-500 "riga"

Relax. delay 1.000 sec  
Pulse 45.0 degrees  
Acq. time 1.892 sec  
Width 10000.0 Hz  
32 repetitions  
OBSERVE E1, 499.7707218 MHz  
DATA PROCESSING  
Line broadening 0.1 Hz  
Ft size 65536  
Total time 1 min, 32 sec

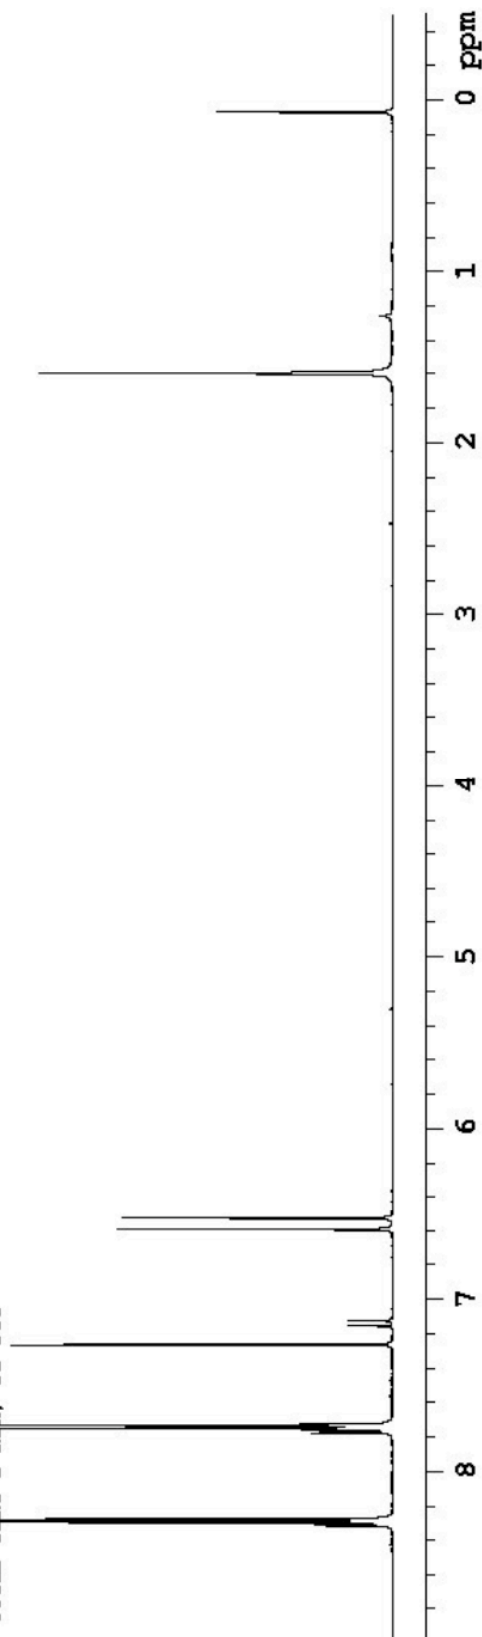

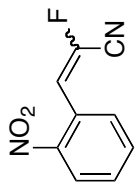

18

Pulse Sequence: s2pul  
Solvent: cdcl3  
Temp. 25.0 C / 298.1 K  
Operator: barbara  
File: 1222-MS-04-320-pure  
INOVA-500 "riga"

Relax. delay 1.000 sec  
Pulse 45.0 degrees  
Acq. time 1.892 sec  
Width 10000.0 Hz  
32 repetitions  
OBSERVE H1, 499.7707215 MHz  
DATA PROCESSING  
FT size 65536  
Total time 1 min, 32 sec

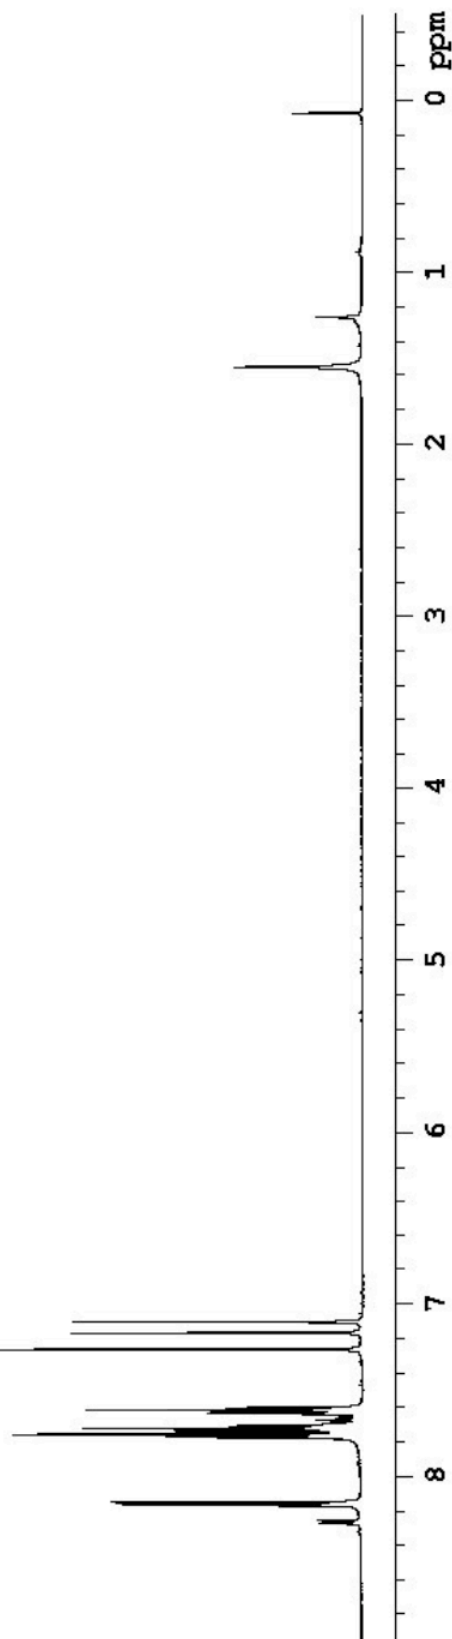

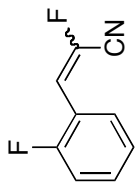

19

Pulse Sequence: s2pul  
Solvent: cdcl3  
Temp. 25.0 C / 298.1 K  
Operator: barbara  
File: 1222-MS-04-321-pure  
INOVA-500 "riga"

Relax. delay 1.000 sec  
Pulse 45.0 degrees  
Acq. time 1.892 sec  
Width 10000.0 Hz  
32 repetitions  
OBSERVE H1, 499.7707215 MHz  
DATA PROCESSING  
FT size 65536  
Total time 1 min, 32 sec

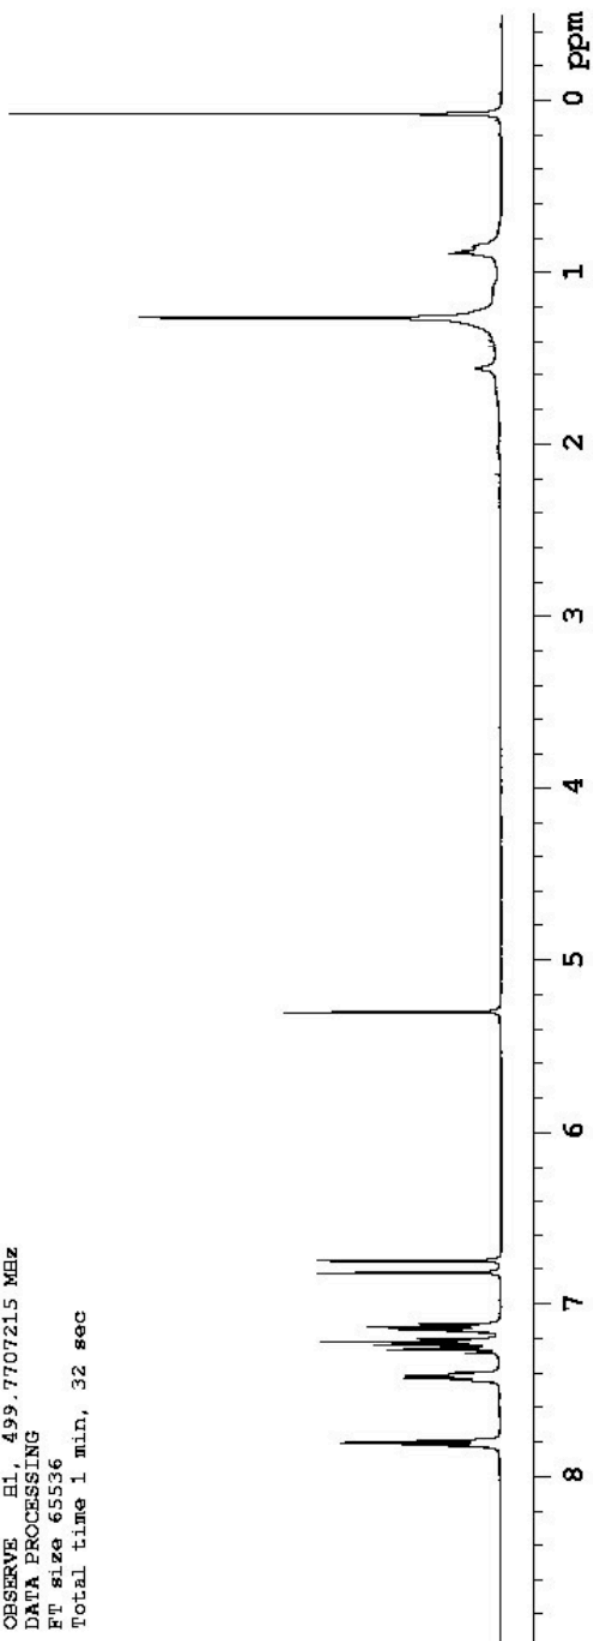

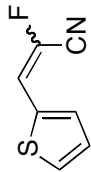

20

Pulse Sequence: s2pul  
Solvent: cdcl3  
Temp. 25.0 C / 298.1 K  
Operator: barbara  
File: 1222-MS-04-327-pure  
INOVA-500 "riga"

Relax. delay 1.000 sec  
Pulse 45.0 degrees  
Acq. time 1.892 sec  
Width 10000.0 Hz  
32 repetitions  
OBSERVE H1, 499.7707095 MHz  
DATA PROCESSING  
FT size 65536  
Total time 1 min, 32 sec

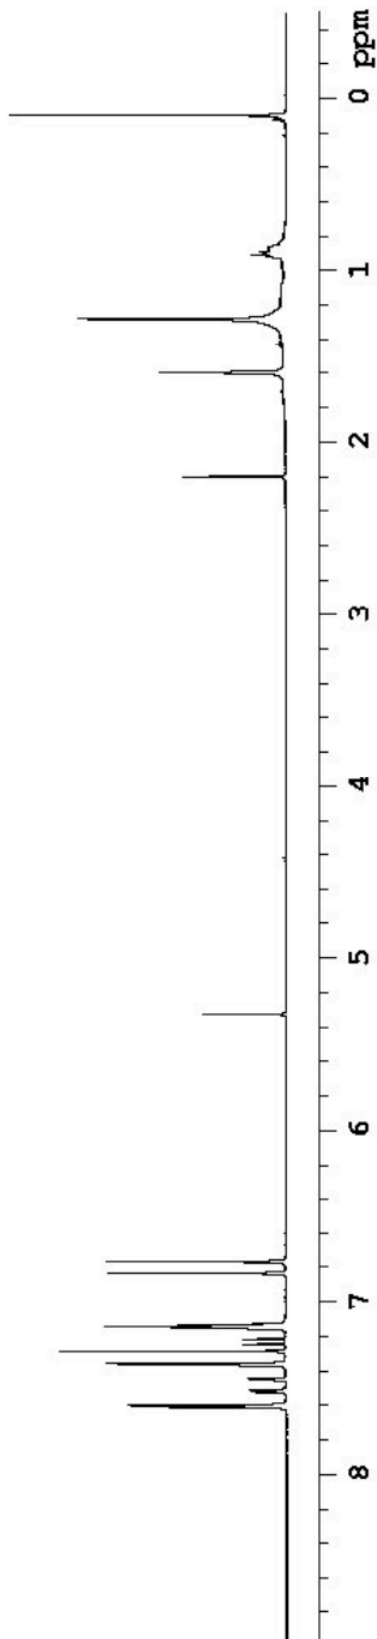



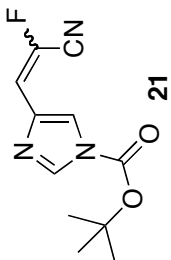

Pulse Sequence: s2pul

Solvent: cdcl3

Temp. 25.0 C / 298.1 K

Operator: barbara

File: 1222-MS-04-304-pure

INOVA-500 "riga"

Relax. delay 1.000 sec

Pulse 45.0 degrees

Acq. time 1.892 sec

Width 10000.0 Hz

32 repetitions

OBSERVE El, 499.7707218 MHz

DATA PROCESSING

ET size 65536

Total time 1 min, 32 sec

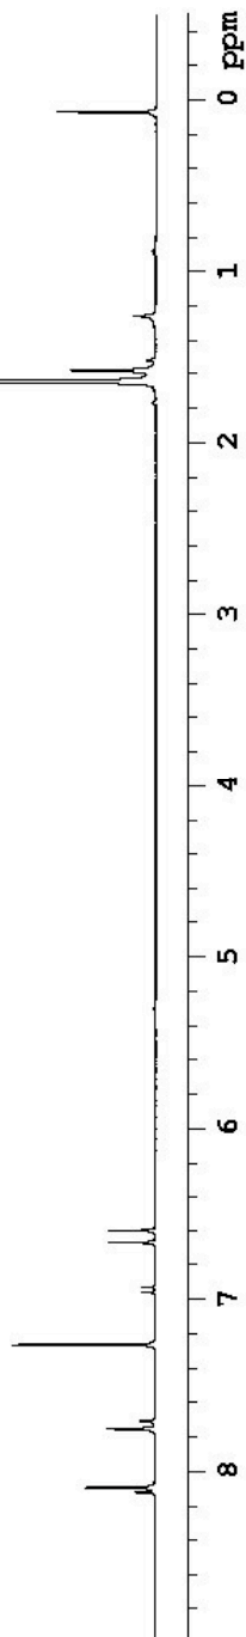

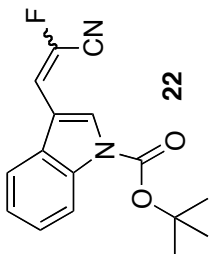

Pulse Sequence: s2pul  
 Solvent: cdcl3  
 Temp. 25.0 C / 298.1 K  
 Operator: barbara  
 File: 1222-MS-04-334-pure  
 INOVA-500 "rriga"

Relax. delay 1.000 sec  
 Pulse 45.0 degrees  
 Acq. time 1.892 sec  
 Width 10000.0 Hz  
 32 repetitions  
 OBSERVE H1, 499.7707221 MHz  
 DATA PROCESSING  
 Line broadening 0.5 Hz  
 FT size 65536  
 Total time 1 min, 32 sec

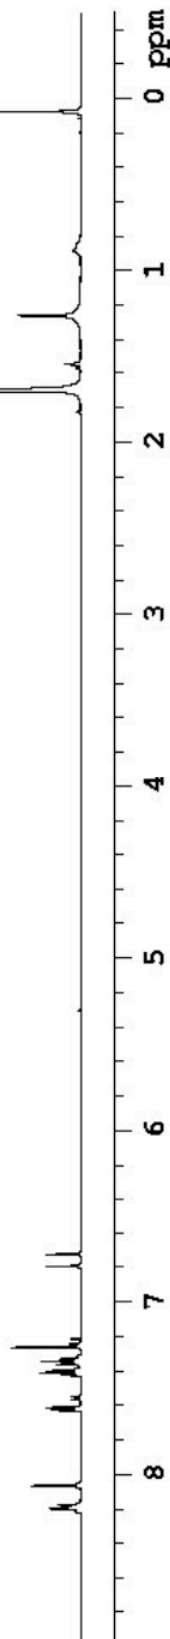

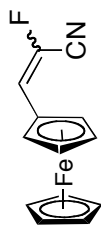

23

Pulse Sequence: s2pul  
Solvent: cdcl3  
Temp. 25.0 C / 298.1 K  
Operator: barbara  
File: 1222-MS-04-328-pure  
INOVA-500 "r1ga"

Relax. delay 1.000 sec  
Pulse 45.0 degrees  
Acq. time 1.892 sec  
Width 10000.0 Hz  
32 repetitions  
OBSERVE E1, 499.7707215 MHz  
DATA PROCESSING  
FT size 65536  
Total time 1 min, 32 sec

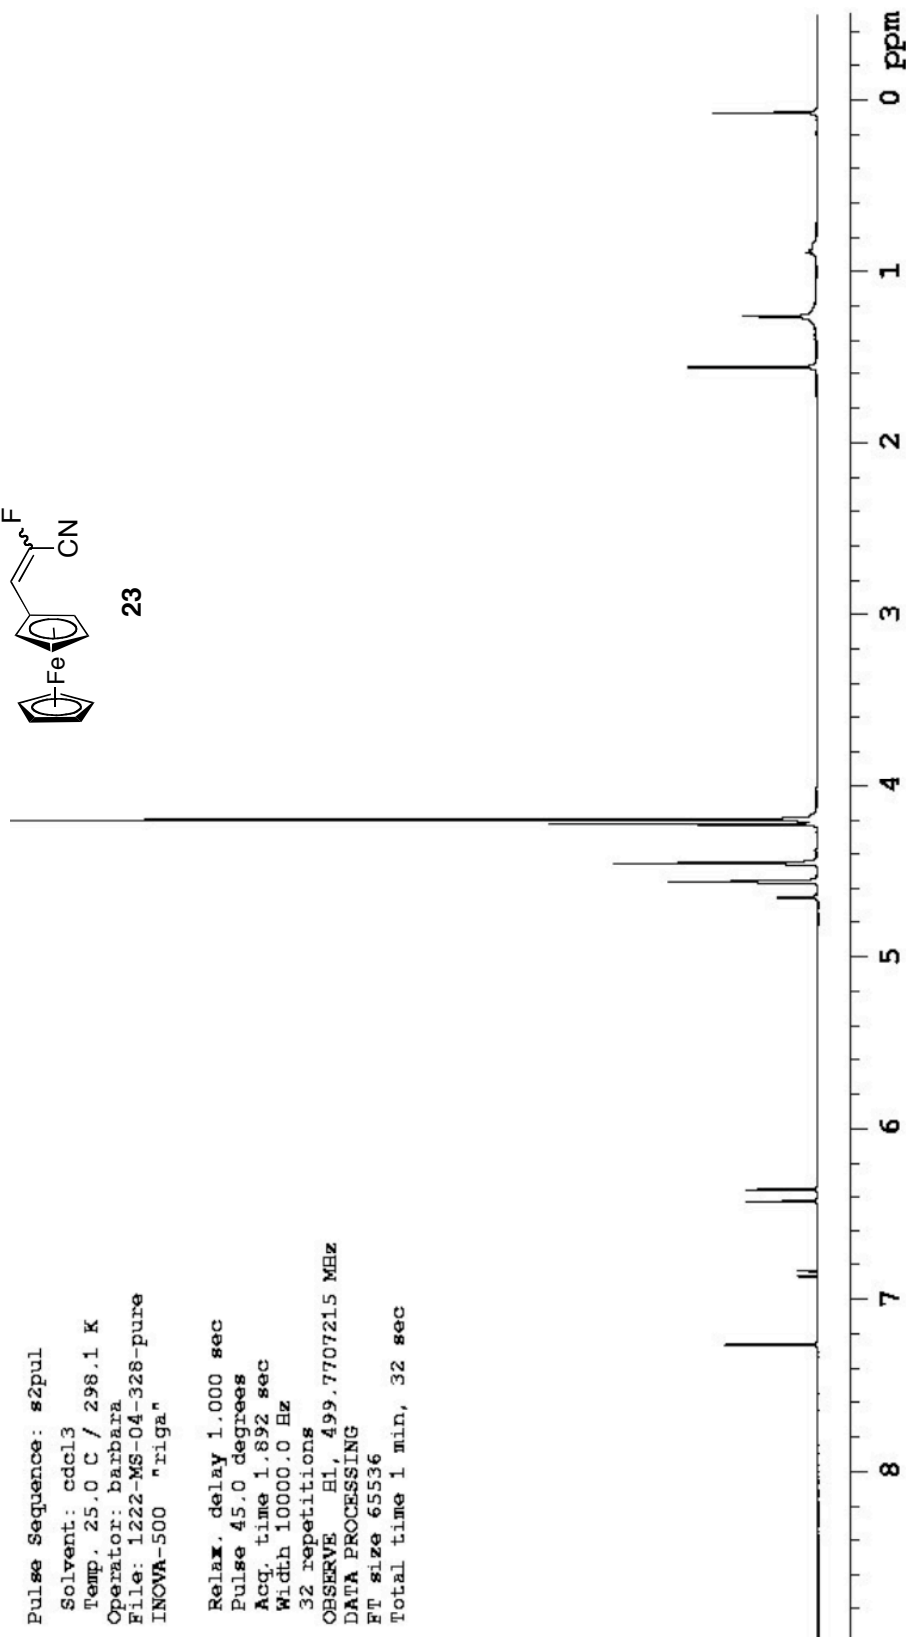

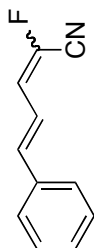

24

Pulse Sequence: s2pul  
Solvent: cdcl3  
Temp. 25.0 C / 298.1 K  
Operator: barbara  
File: 1222-MS-04-329-pure  
INOVA-500 "riga"

Relax. delay 1.000 sec  
Pulse 45.0 degrees  
Acq. time 1.892 sec  
Width 10000.0 Hz  
32 repetitions  
OBSERVE H1, 499.7707095 MHz  
DATA PROCESSING  
Line broadening 0.1 Hz  
FT size 65536  
Total time 1 min, 32 sec

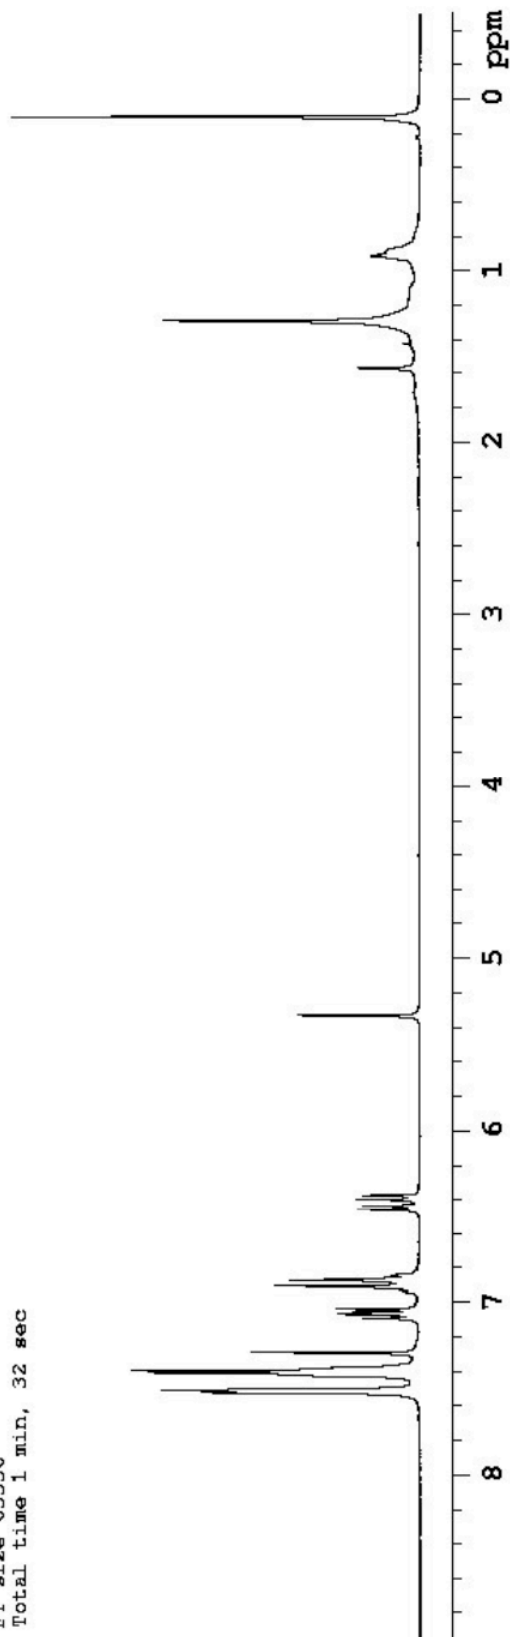

Pulse Sequence: s2pul  
Solvent: CDCL3  
Ambient temperature  
Operator: barbara  
File: 1222-MS-04-317-pure  
INOVA-500 "ruga"

Relax. delay 4.000 sec  
Pulse 45.0 degrees  
Acq. time 1.892 sec  
Width 10000.0 Hz  
32 repetitions  
OBSERVE E1, 499.770720 MHz  
DATA PROCESSING  
Line broadening 0.5 Hz  
FT size 65536  
Total time 3 min, 8 sec

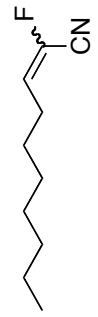

25

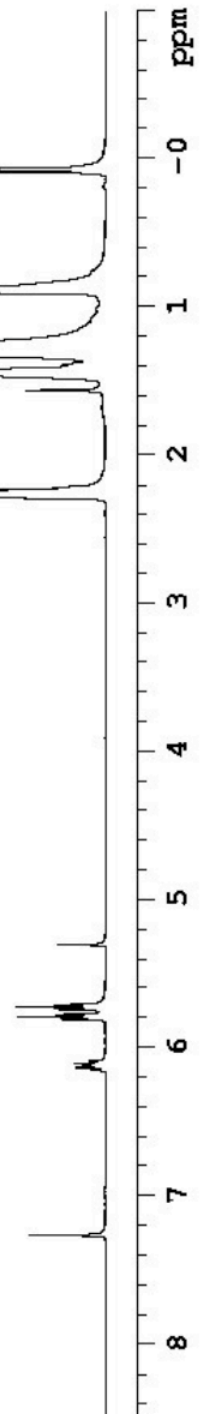

Pulse Sequence: s2pul  
Solvent: CDCL3  
Ambient temperature  
Operator: Barbara  
File: 1222-MS-04-318-pure  
INOVA-500 "riga"

Relax. delay 4.000 sec  
Pulse 45.0 degrees  
Acq. time 1.892 sec  
Width 10000.0 Hz  
12 repetitions  
OBSERVE E1, 499.7707226 MHz  
DATA PROCESSING  
Line broadening 0.5 Hz  
FT size 65536  
Total time 3 min, 8 sec

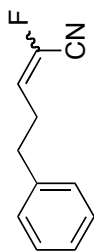

26

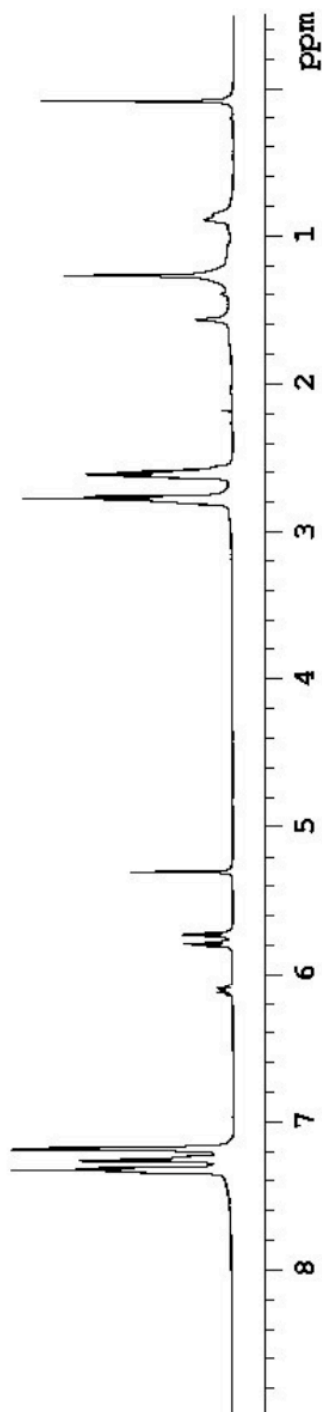

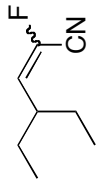

27

Pulse Sequence: s2pul  
Solvent: cdcl3  
Temp. 25.0 C / 298.1 K  
Operator: barbara  
File: 1222-MS-04-313-pure  
INOVA-500 "riga"

Relax. delay 1.000 sec  
Pulse 45.0 degrees  
Acq. time 1.892 sec  
Width 10000.0 Hz  
32 repetitions  
OBSERVE E1, 499.7707095 MHz  
DATA PROCESSING  
Line broadening 0.5 Hz  
FT size 65536  
Total time 1 min, 32 sec

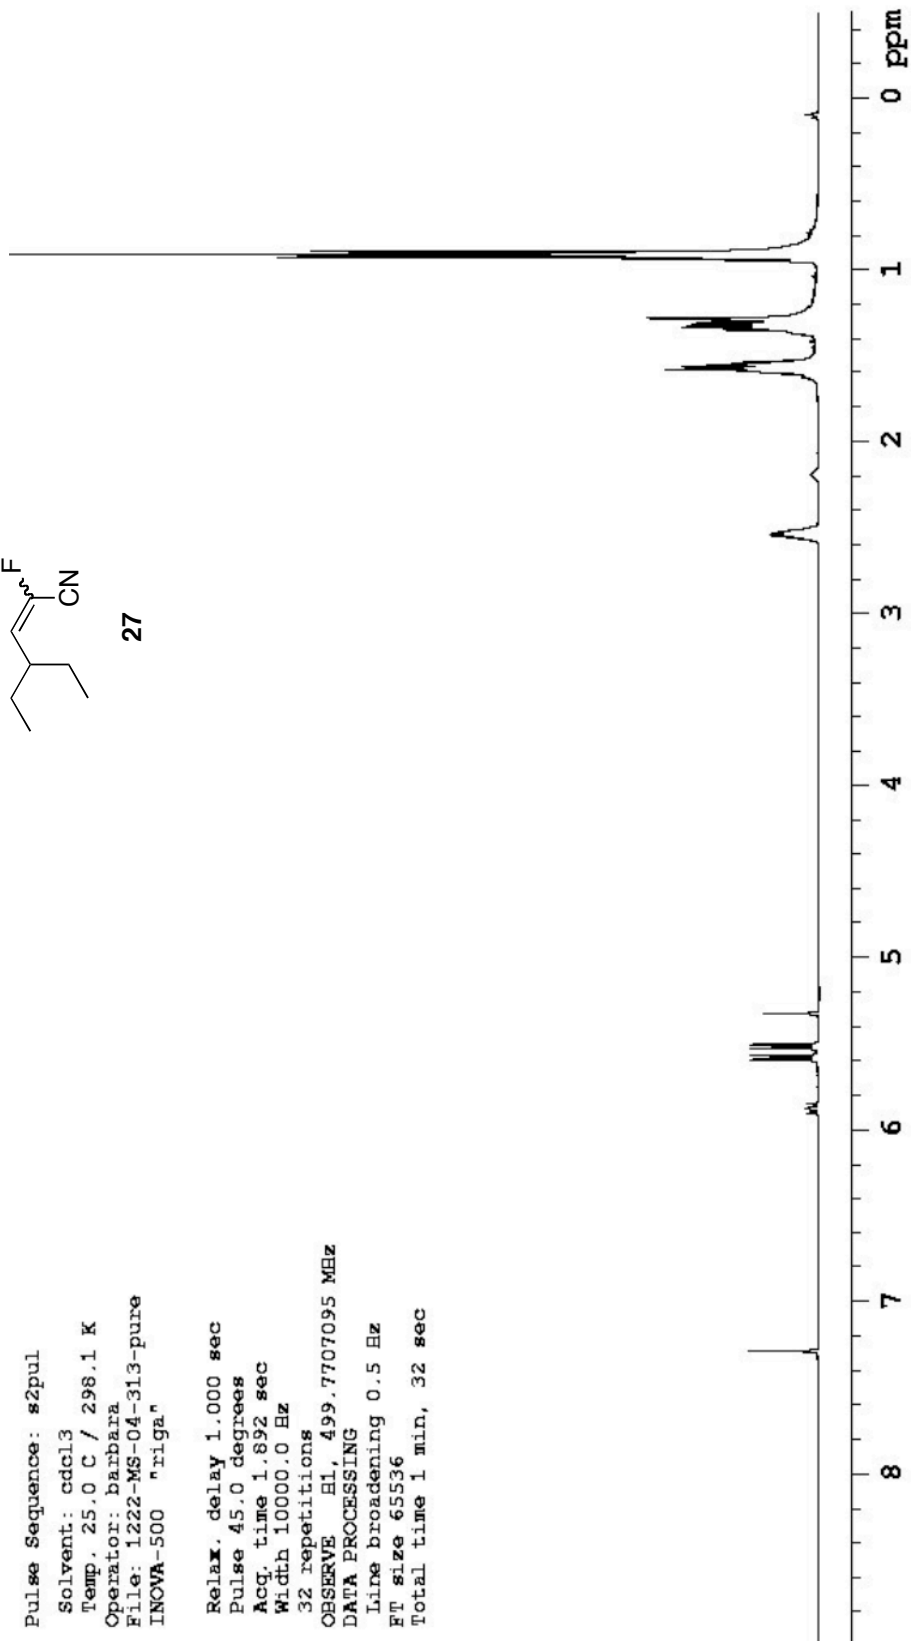

Supplement: NIHMS91074-supplement-1_si_001.pdf [file NIHMS91074-supplement-1_si_001.pdf]
